# Supplementary material for: Treatment preferences for preventive interventions for rheumatoid arthritis: protocol of a mixed methods case study for the Innovative Medicines Initiative PREFER project
Source: PubMed Central journal article supplement — BMJ Open. 2021 Apr 8;11(4):e045851. doi: 10.1136/bmjopen-2020-045851 (PMC8039213; doi:10.1136/bmjopen-2020-045851), 2021-04-08
Supplement: bmjopen-2020-045851.draft_revisions.pdf [file bmjopen-2020-045851.draft_revisions.pdf]

# BMJ Open

BMJ Open is committed to open peer review. As part of this commitment we make the peer review history of every article we publish publicly available.

When an article is published we post the peer reviewers' comments and the authors' responses online. We also post the versions of the paper that were used during peer review. These are the versions that the peer review comments apply to.

The versions of the paper that follow are the versions that were submitted during the peer review process. They are not the versions of record or the final published versions. They should not be cited or distributed as the published version of this manuscript.

BMJ Open is an open access journal and the full, final, typeset and author-corrected version of record of the manuscript is available on our site with no access controls, subscription charges or pay-per-view fees (<http://bmjopen.bmj.com>).

If you have any questions on BMJ Open's open peer review process please email [info.bmjopen@bmj.com](mailto:info.bmjopen@bmj.com)

# BMJ Open

## Treatment preferences for preventive interventions for rheumatoid arthritis: Protocol of a case study for the Innovative Medicines Initiative PREFER project.

|                               |                                                                                                                                                                                                                                                                                                                                                                                                                                                                                                                                                                                                                                                                                                                                         |
|-------------------------------|-----------------------------------------------------------------------------------------------------------------------------------------------------------------------------------------------------------------------------------------------------------------------------------------------------------------------------------------------------------------------------------------------------------------------------------------------------------------------------------------------------------------------------------------------------------------------------------------------------------------------------------------------------------------------------------------------------------------------------------------|
| Journal:                      | <i>BMJ Open</i>                                                                                                                                                                                                                                                                                                                                                                                                                                                                                                                                                                                                                                                                                                                         |
| Manuscript ID                 | bmjopen-2020-045851                                                                                                                                                                                                                                                                                                                                                                                                                                                                                                                                                                                                                                                                                                                     |
| Article Type:                 | Protocol                                                                                                                                                                                                                                                                                                                                                                                                                                                                                                                                                                                                                                                                                                                                |
| Date Submitted by the Author: | 14-Oct-2020                                                                                                                                                                                                                                                                                                                                                                                                                                                                                                                                                                                                                                                                                                                             |
| Complete List of Authors:     | Falahee, Marie; University of Birmingham, Institute of Inflammation and Ageing<br>Simons, Gwenda; University of Birmingham, Institute of Inflammation and Ageing<br>DiSantostefano, Rachael; Janssen Pharmaceuticals Inc<br>Valor Méndez, Larissa; Friedrich-Alexander-Universität Erlangen-Nürnberg<br>Radawski, Christine; Eli Lilly and Company<br>Englbrecht, Matthias; Freelance Healthcare Data Scientist<br>Bywall, Karin; Uppsala Universitet<br>Tcherny-Lessenot, Stephanie; Sanofi SA<br>Kihlbom, Ulrik; Uppsala Universitet<br>Hauber, Brett; RTI Health Solutions Research Triangle Park<br>Veldwijk, Jorien; Erasmus Universiteit Rotterdam<br>Raza, Karim; University of Birmingham, Institute of Inflammation and Ageing |
| Keywords:                     | RHEUMATOLOGY, PREVENTIVE MEDICINE, PUBLIC HEALTH                                                                                                                                                                                                                                                                                                                                                                                                                                                                                                                                                                                                                                                                                        |
|                               |                                                                                                                                                                                                                                                                                                                                                                                                                                                                                                                                                                                                                                                                                                                                         |

SCHOLARONE™  
Manuscripts

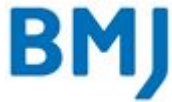

I, the Submitting Author has the right to grant and does grant on behalf of all authors of the Work (as defined in the below author licence), an exclusive licence and/or a non-exclusive licence for contributions from authors who are: i) UK Crown employees; ii) where BMJ has agreed a CC-BY licence shall apply, and/or iii) in accordance with the terms applicable for US Federal Government officers or employees acting as part of their official duties; on a worldwide, perpetual, irrevocable, royalty-free basis to BMJ Publishing Group Ltd ("BMJ") its licensees and where the relevant Journal is co-owned by BMJ to the co-owners of the Journal, to publish the Work in this journal and any other BMJ products and to exploit all rights, as set out in our [licence](#).

The Submitting Author accepts and understands that any supply made under these terms is made by BMJ to the Submitting Author unless you are acting as an employee on behalf of your employer or a postgraduate student of an affiliated institution which is paying any applicable article publishing charge ("APC") for Open Access articles. Where the Submitting Author wishes to make the Work available on an Open Access basis (and intends to pay the relevant APC), the terms of reuse of such Open Access shall be governed by a Creative Commons licence – details of these licences and which [Creative Commons](#) licence will apply to this Work are set out in our licence referred to above.

Other than as permitted in any relevant BMJ Author's Self Archiving Policies, I confirm this Work has not been accepted for publication elsewhere, is not being considered for publication elsewhere and does not duplicate material already published. I confirm all authors consent to publication of this Work and authorise the granting of this licence.

## Treatment preferences for preventive interventions for rheumatoid arthritis: Protocol of a case study for the Innovative Medicines Initiative PREFER project

Marie Falahee<sup>1\*</sup>, Gwenda Simons<sup>1\*</sup>, Rachael L. DiSantostefano<sup>2</sup>, Larissa Valor-Méndez<sup>3</sup>, Christine Radawski<sup>4</sup>, Matthias Englbrecht<sup>5</sup>, Karin Schölin Bywall<sup>6</sup>, Stéphanie Tcherny-Lessenot<sup>7</sup>, Ulrik Kihlbom<sup>6</sup>, Brett Hauber<sup>8,9</sup>, Jorien Veldwijk<sup>10,11</sup>, Karim Raza<sup>1,12,13</sup>.

<sup>1</sup>Institute of Inflammation and Ageing, College of Medical and Dental Sciences, University of Birmingham Research Laboratories, Queen Elizabeth Hospital, Birmingham B15 2WB, UK

<sup>2</sup>Janssen Pharmaceuticals, Titusville, NJ, USA

<sup>3</sup>Department of Internal Medicine and Institute for Clinical Immunology, Friedrich-Alexander-University Erlangen-Nürnberg (FAU) and Universitätsklinikum, Erlangen, Germany

<sup>4</sup>Eli Lilly and Company, Lilly Corporate Center, 893 S Delaware St., Indianapolis, IN 46285, USA

<sup>5</sup>Freelance Healthcare Data Scientist, Eckental, Germany

<sup>6</sup>Centre for Research Ethics & Bioethics, Uppsala University, Husargatan 3, Box 564, 752 37, Uppsala, Sweden

<sup>7</sup>Global Pharmacovigilance and Epidemiology, Sanofi, Paris, France

<sup>8</sup>RTI Health Solutions, Research Triangle Park, NC, USA.

<sup>9</sup>Comparative Health Outcomes, Policy, and Economics (CHOICE) Institute, University of Washington School of Pharmacy, Seattle, WA 98195, USA

<sup>10</sup>Julius Center for Health Sciences and Primary Care, University Medical Center Utrecht, Utrecht University, Utrecht, The Netherlands

<sup>11</sup>School of Health Policy & Management and Erasmus Choice Modelling Centre, Erasmus University Rotterdam, Rotterdam, Netherlands

<sup>12</sup>Department of Rheumatology, Sandwell and West, Birmingham Hospitals NHS Trust, Birmingham, B18 7QH, UK

<sup>13</sup>MRC Versus Arthritis Centre for Musculoskeletal Ageing Research, and Research into Inflammatory Arthritis Centre Versus Arthritis, College of Medical and Dental Sciences, University of Birmingham, B15 2TT, UK

\* Joint first authors

Corresponding author: Marie Falahee, Institute of Inflammation and Ageing, College of Medical and Dental Sciences, University of Birmingham Research Laboratories, Queen Elizabeth Hospital, Birmingham B15 2WB, UK. Email: [m.falahee@bham.ac.uk](mailto:m.falahee@bham.ac.uk)

**Keywords:** Treatment preferences; rheumatoid arthritis; preventive medicine; immunotherapy; drug development; nominal group technique; discrete choice experiment; probabilistic threshold technique

**Word count:** 3965

## Abstract

### Introduction

Amidst growing consensus that stakeholder decision-making during drug development should be informed by an understanding of patient preferences, The Innovative Medicines Initiative project 'Patient Preferences in Benefit-Risk Assessments during the Drug Life Cycle (PREFER)' is developing evidence-based recommendations about how and when patient preferences should be integrated into the drug lifecycle. This protocol describes a PREFER clinical case study which compares two preference elicitation methodologies across several populations and provides information about benefit-risk trade-offs by those at risk of rheumatoid arthritis (RA) for preventive interventions.

### Methods and analysis:

This mixed-methods study will be conducted in three countries (UK, Germany, Romania) to assess preferences of a) first degree relatives (FDRs) of patients with RA, and b) members of the public. Focus groups using nominal group techniques (UK) and ranking surveys (Germany and Romania) will identify and rank key treatment attributes. Focus group transcripts will be analyzed thematically using the framework method, and average rank orders calculated. These results will inform the treatment attributes to be assessed in a survey including a discrete choice experiment (DCE) and a probabilistic threshold technique (PTT). The survey will also include measures of sociodemographic variables, health literacy, numeracy, illness perceptions and beliefs about medicines. The survey will be administered to a) 400 FDRs of RA patients (UK); b) 100 FDRs of RA patients (Germany); c) 1000 members of the public in each of the UK, Germany and Romania. Logit-based approaches will be used to analyze the DCE, and imputation and interval regression for the PTT.

### Ethics and Dissemination:

This study has been approved by the London-Hampstead Research Ethics Committee (19/LO/0407), and the Ethics Committee of the Friedrich-Alexander-Universität Erlangen-Nürnberg (92\_17 B). The protocol has been approved by the PREFER expert review board. The results will be disseminated widely, and will inform the PREFER recommendations.

### Strengths and limitations of this study

- This study has been developed by an international, multidisciplinary team of academic, clinical, pharmaceutical industry and patient partners, and provides an example of a rigorously designed treatment preference study that is informative for a range of stakeholders.
- This study addresses both clinical and methodological research objectives, and the findings will contribute to both the development of efficient prevention strategies for RA and the development of best practice on the integration of patient preferences into drug development.
- This study involves a substantial sample size across several populations allowing comparison of treatment preferences, psychological variables and sociodemographic information across populations in three European countries.
- This is the first quantitative study of preferences for preventive treatments for rheumatoid arthritis (RA) involving confirmed, rather than self-reported, first degree relatives of patients with a clinician confirmed diagnosis of RA.

## Introduction

There is increasing agreement that decision-making by the pharmaceutical industry, regulators, and health technology assessment (HTA) bodies throughout the development of medical products should be informed by an understanding of patient preferences, and that guidance on best practice is required.[1-4] This study is a case study for the Innovative Medicines Initiative (IMI) project ‘Patient Preferences in Benefit-Risk Assessments during the Medical Product Lifecycle’ (PREFER). PREFER aims to strengthen patient-centric decision-making products by developing evidence-based recommendations to guide stakeholders on how and when patient preference studies should inform decision-making.

There are many methodological research questions that warrant further study in preference research.[5] PREFER conducted a landscape assessment to identify the most important questions and pair them with clinical case studies, based on the disease under investigation, anticipated sample size, and clinical research objectives. The results of these studies will inform the development of recommendations for conducting preference studies. The background to both the clinical and methodological questions addressed in the present study is outlined below.

### *Clinical background*

Rheumatoid arthritis (RA) is a common chronic destructive polyarthritis, affecting approximately 1% of the general population [6, 7]. Typical age of onset is between 40 to 60 years old, although it can begin at much younger and older ages. If untreated, RA causes joint damage and disability. RA is associated with significant extra-articular manifestations reducing life expectancy by approximately 10 years [8].

It is not currently possible to cure RA and long-term treatment is usually required. Available treatments include conventional (c), biological (b) and targeted synthetic (ts) disease-modifying anti-rheumatic drugs (DMARDs), with varying benefit-risk profiles. The mainstay of treatment is methotrexate, a relatively inexpensive cDMARD to which approximately one third of patients respond well [9]. For those who do not respond well to first-line treatment, the use of a combination of cDMARDs and the addition of more (expensive) bDMARDs may be employed. Prolonged use of cDMARDs and bDMARDs is associated with considerable risk, including risk of infection and of lung, liver and haematological toxicity [9].

Very early treatment of RA is associated with improved outcomes [10, 11]. There is now considerable research focus on treating ‘at risk’ individuals in the preclinical and earliest clinically apparent phases of RA [12, 13] to assess whether a relatively short course of therapy will prevent or delay the onset of RA. EULAR recommendations identify five groups appropriate for prospective trials: individuals without RA having: (i) genetic risk factors for RA; (ii) environmental risk factors for RA; (iii) systemic autoimmunity associated with RA; (iv) symptoms without clinical arthritis (arthralgia); or (v) unclassified arthritis [14].

Two completed [15, 16]; and five ongoing (APPIPRA [17]; ARIAA [18]; TREAT EARLIER [19]; STAPRA [20]; STOPRA [21]) proof-of-concept trials are assessing the effectiveness of drugs currently used to treat RA to prevent or delay the onset of RA in one or more of these ‘at risk’ groups. Novel immune tolerising therapies are also being investigated in another IMI project, ‘RheumaTolerance for Cure’ [22].

1  
2  
3 While members of the general population have a 1/100 probability of developing RA, first-  
4 degree relatives (FDRs; EULAR ‘at risk’ stages i-ii) of existing patients are four times more  
5 likely to develop RA in the future [23]. FDRs are therefore likely candidates for preventive  
6 approaches. For example, the SToPRA trial (evaluating the preventive effectiveness of a 12  
7 month course of hydroxychloroquine [21]) is recruiting asymptomatic FDRs of RA patients  
8 and individuals attending health fairs who are auto-antibody positive (EULAR ‘at risk’ stages  
9 i-iii).

10  
11  
12 Understanding the treatment preferences of ‘at risk’ groups is especially important in  
13 preventive contexts, where there is uncertainty regarding: treatment effectiveness and safety  
14 (as per standard patient preference studies); and also the individual’s baseline risk of  
15 developing RA in the future, the timeline for that risk and the likely future severity of disease.  
16 As prospective studies elucidate biomarkers predictive of RA development, risk stratification  
17 of healthy individuals is increasingly likely to facilitate early treatment and preventive  
18 interventions [24-26]. As prevention research evolves, knowledge of the preferences of ‘at risk’  
19 individuals around RA treatments repurposed for prevention and (as yet) hypothetical new ones  
20 will be valuable to inform the development and regulation of efficient and effective preventive  
21 interventions for RA.  
22  
23

24  
25 It is also of value to understand treatment preferences in the general public who are asked to  
26 imagine being at an elevated risk of developing RA. The assessment of preferences of FDRs at  
27 increased risk of RA and a general population that is told to assume an increased risk of RA  
28 allows for comparisons between groups that are expected to vary in their familiarity with and  
29 understanding of RA [27]. Public misperceptions around the identity and severity of RA are  
30 common [28, 29].  
31

32  
33 A small number of qualitative studies have explored perceptions of preventive intervention for  
34 RA [30-33], but quantitative evidence is limited [34]. A discrete choice experiment (DCE)  
35 assessing preferences for preventive pharmacological interventions for RA of 288 self-reported  
36 FDRs recruited via Amazon Mechanical Turk, suggested that mode of administration may be  
37 an important determinant of preventive treatment acceptability [35]. This finding was echoed  
38 in a subsequent study that included 30 self-reported FDRs [36]. However, a best-worst scaling  
39 pilot study found that the effectiveness and risks of preventive treatments were more important  
40 than mode of administration for a small sample of 34 FDRs taking part in a prospective cohort  
41 study [37]. Further quantitative evidence is needed in clinically validated populations and  
42 larger samples. The primary clinical objective of this preference study is therefore to establish  
43 the preferences of ‘at risk’ individuals (i.e., children or siblings of confirmed RA patients) and  
44 the general public for preventive therapies for RA.  
45  
46

#### 47 *Methodological background*

48

49  
50 PREFER has identified a number of methodological questions for which evidence is currently  
51 lacking. This case study will provide evidence to address several methodological questions in  
52 line with PREFER strategy. Firstly, there is no consensus on which is the best method to gather  
53 quantitative treatment preference data, and multiple techniques ranging from simple ranking  
54 exercises to complex, resource intensive trade-off methods are employed. PREFER seeks to  
55 assess how similar the results of simpler/faster/cheaper methods are compared to more  
56 rigorous/in depth/expensive preference methods involving the same set of treatment attributes.  
57 This case study will compare preferences for preventive treatments elicited by a DCE [38] and  
58 probabilistic threshold technique (PTT) [39, 40].  
59  
60



1  
2  
3 In a typical DCE, respondents are asked to complete several 'choice tasks'. Each consists of  
4 choosing between two or more alternatives that describe a treatment (or no treatment). The  
5 description of the treatment is based on its characteristics, or 'attributes'. The individual's  
6 preference for an alternative can be determined based on the values of the levels of the included  
7 attributes across the choice tasks. The Probabilistic Threshold Technique (PTT) has a similar,  
8 but simpler choice task as the DCE. Rather than varying all attribute levels according to an  
9 experimental design, individuals choose between a reference treatment profile and an  
10 alternative treatment where only one attribute is improved or made worse until the participant  
11 changes their choice from one profile to the other. The point at which the participant switches  
12 their choice is the threshold. The PTT is simpler in that it does not require an experimental  
13 design, specialized analytical or design software, or complex multivariate conditional models.  
14 This study will determine the extent to which results using the PTT differ from results of the  
15 relatively complex DCE. The DCE attributes and levels will be determined first, and the PTT  
16 alternatives will be chosen based on the DCE attributes and levels, including which attribute to  
17 modify. The exact selection and formulation of the attributes included in both choice methods  
18 will be based on a previous qualitative research phase.  
19  
20  
21

22 A further PREFER objective is to investigate the relationship between measures of  
23 psychological constructs and preference heterogeneity. In order to do so, this study will assess  
24 whether measures of psychological constructs (i.e., perceived risk, beliefs about medicines,  
25 illness perceptions) can explain preference heterogeneity, as evidence in this area is limited  
26 [41]. Other measures such as health literacy, and numeracy might also explain preference  
27 heterogeneity, and could impact preference construction (i.e., leading to differences in choice  
28 consistency, certainty etc.) [42] and will also be assessed.  
29  
30  
31

32 The current case study will take place in the same format in the UK, Germany and Romania  
33 enabling comparisons across countries, thus addressing a further PREFER methodological  
34 objective, and elucidating the transferability of preferences across regions. Finally, as most  
35 current intervention trials in individuals at risk of RA are targeting patients with early  
36 symptoms (e.g., joint pain) and elevated RA related autoantibodies, the current case study will  
37 ask FDR participants to imagine they have started to develop joint symptoms and have had  
38 blood tests, which indicate that they are at high risk of developing RA within two years.  
39 Similarly, members of the general population will be asked to imagine the same scenario. This  
40 will allow assessment of whether the FDRs respond systematically differently than members  
41 of the general public. This will address PREFER questions related to both the generalizability  
42 of preferences from one specific population in a disease to different populations.  
43  
44  
45  
46  
47

## 48 **Methods and analysis**

49 This study will consist of 2 phases. A focus group/interview study using Nominal Group  
50 Technique (NGT) [43] in the UK with confirmatory ranking surveys in Germany and Romania  
51 will be conducted to explore attributes relevant to decision-making about treatments to prevent  
52 RA, and inform the selection and definition of attributes to be used in a quantitative study. This  
53 will be followed by a stated preference survey to assess treatment preferences of FDRs and the  
54 general population.  
55  
56

57 We will employ evidence-based guidelines and best practices for study design and conduct,  
58 including focus groups [44], nominal group techniques [43], and for preference study design  
59 and analysis [45, 46]  
60

### *Focus group/ interview study*

The outcomes of the focus group/interview study will be: [i] a description of themes that are important considerations for decision making about preventive treatment for RA; [ii] a list of treatment attributes relevant for decision making, and their rank order.

We aim to conduct four focus groups: two with FDRs, and two with the general population in the UK. Each focus group will have approximately five to seven respondents. Four focus groups are expected to be sufficient to generate attributes since focus groups have been shown to yield concept saturation after two to four group discussions [44]. All participants will be aged 18 years or older. Focus group participants will be offered £20 as an incentive. Focus groups will take place at the University of Birmingham, UK.

Members of the general population will be invited to the focus group through an advert on community message boards and online research recruitment platforms. FDRs will be recruited indirectly, through patients with RA identified at outpatient clinics at participating sites. All focus group participants will provide informed consent before taking part, facilitated by a participant information sheet (PIS).

To increase consistency across focus groups, a semi-structured interview guide with questions about characteristics that might be expected in a preventive treatment for RA will be developed. The guide will be developed with clinical expert input and an international panel of patient research partners and informed by a review of the literature. Any treatment attributes that have featured across previous studies of preferences for RA treatments that are not identified during the initial discussion will be introduced to participants for further discussion. NGT[43] will be used to obtain rankings of attributes identified in the focus group by their relative importance to inform the preference study design.

We will ask focus group participants to imagine they have started to develop joint pain and have had a blood test that indicates they have a 40% risk to develop RA in the next 2 years. This is representative of participants included in current trials of preventive interventions for RA, whose risk of developing RA within 2 years is between 10% and 60% depending on the presence of other risk factors[47].

The focus group discussions will be audio recorded and transcribed verbatim. The transcripts will be analyzed using the Framework Method [48]. At least 20% of transcripts will be independently coded by multiple researchers to develop a coding framework with input from patient research partners. At least two researchers will independently code each transcript applying the agreed framework.

Analysis of transcripts will proceed at the same time as data collection. When there is consensus amongst the research team that thematic saturation has been achieved and no new treatment attributes are being identified, no new focus groups will be scheduled. The original list of attributes used for the ranking exercises in the NGT, will then be included in a ranking survey for FDRs and members of the general public in Germany (N=30) and members of the general public in Romania (N=30). This survey aims to confirm/validate the selection of the most important treatment attributes across all countries involved in the quantitative study. The attribute rankings and focus groups findings will then be reviewed with clinical and methodological experts and patient partners to select those appropriate for inclusion in a DCE, and a representative range of levels for each attribute will be selected. Any high-ranking

1  
2  
3 attributes that are not included in the DCE (e.g., because of likely dominance) will be included  
4 (at a constant level) in the survey choice task setting.  
5  
6  
7

### 8 *Stated preference study*

9  
10 The attributes and levels identified above will be incorporated into a survey containing both a  
11 DCE and PTT. Both approaches will assess preferences for RA preventive treatments by asking  
12 respondents to choose between treatment alternatives. Each treatment will be described in  
13 terms of its level of each attribute. The order of presentation (DCE followed by PTT, or vice  
14 versa) will be randomized.  
15  
16

17 The combinations of attribute levels that define each profile and the set of profiles in each  
18 choice question in a DCE are known as the experimental design. The experimental design must  
19 have statistical properties that allow estimation of the preference weights of interest. This study  
20 will use Ngenie (ChoiceMetrics, Sydney, Australia) to construct a Bayesian D-efficient  
21 fractional-factorial experimental design [49]. Prior information on the importance of the  
22 attributes will be based on previous literature and best guesses for a pilot study, and outcomes  
23 of initial analysis (conditional logit) of pilot data for the main survey.  
24  
25

### 26 *Survey instrument*

27  
28 All participants will provide informed consent before completing the survey. Respondents will  
29 complete a demographic questionnaire and assess their perceived risk of developing RA. They  
30 will be asked to read a description of RA and risk factors for RA developed with clinical experts  
31 and patient partners. Respondents will then be asked to imagine they have started to develop  
32 joint pain and have had a blood test that indicates they have an elevated risk of developing RA  
33 in the next 2 years. This will be followed by evaluation questions, including warm up and  
34 knowledge questions to test participant understanding of the information presented. For  
35 example, the participant may be shown a risk grid to test understanding of percentages, with 3  
36 persons selected and 97 persons not selected to test understanding of 3% or 3 in 100. This will  
37 be followed by either the DCE/PPT choice task questions, which will be preceded by a guided  
38 'walk through' demonstration of a DCE/PTT choice task and some warm-up questions. To  
39 avoid carry-over effects from DCE to PTT or vice versa, respondents will then complete the  
40 Single Item Literacy Screener (SILS[50]) and the 3-item version of the Subjective Numeracy  
41 Scale (SNS- 3[51]). This will be followed by a guided example and evaluation questions for  
42 the choice tasks of the second method, followed by the actual choice tasks. Participants will  
43 then complete the Brief Illness Perception Questionnaire (B-IPQ)[52, 53] and the Beliefs about  
44 Medicines Questionnaire-General (BMQ-General)[54]. On completion of the survey,  
45 participants will be provided with sources of additional information about RA and risk factors  
46 for RA.  
47  
48  
49

50 The survey will be pre-tested in a convenience sample (N=15) using qualitative think aloud  
51 interviews. These participants will be paid 20 GBP/Euro in shopping vouchers. To inform the  
52 final experimental design and optimize statistical efficiency a survey pilot will be conducted  
53 with 100 members of the general public in the UK.  
54  
55

### 56 *Survey sample*

57  
58 A total of 3,500 participants who have not received a diagnosis of RA will be recruited,  
59 including:  
60

- 400 adults who are FDRs of an individual with a confirmed diagnosis of RA, UK
- 100 adults who are FDRs of an individual with a confirmed diagnosis of RA, Germany
- 1000 adults from the general population, UK survey panel
- 1000 adults from the general population, Germany survey panel
- 1000 adults from the general population, Romania survey panel

All participants will be asked to assume an increased risk of developing RA in the next 2 years.

A priori sample-size calculations represent a challenge in DCE experiments. Most published studies have a sample size of 100 to 300 respondents [55]. However, the minimum sample size depends on several criteria, including question format, choice task complexity, desired precision of results, and subgroup analyses [46, 56]. A method for computing sample size was proposed by de Bekker-Grob [57], however, as the article highlights, there is no analytic solution or power calculation that can be used to determine the appropriate sample size for a DCE unless enough information to inform the selection of priors exists.

There is no specific power calculation to determine sample size in PTT studies without knowing the expected threshold value a priori. Most PTT studies are conducted with 100 or fewer respondents, and substantially smaller samples (between 20 and 42 respondents) have been used successfully in previous studies [57-60]. Given the lack of clear guidance on sample size estimation for PTT we assume that a minimum sample size of 50 per PTT choice set would be needed to estimate a threshold value in each threshold exercise. To account for potential heterogeneity, a minimum total sample size of 100 will be considered sufficient to answer the primary objective. A target sample size of 200 is sufficient for the purposes of conducting subgroup analyses.

Based on the sample size requirements for both methods and accounting for the number of research questions this study anticipates to answer, a sample size of 400 respondents at risk of RA and 1000 from a panel in each country should be sufficient and provide enough information to identify preferences in these groups and comparisons across these groups with acceptable precision.

### *Sample Identification and Eligibility*

FDRs will be recruited through patients with a confirmed diagnosis of RA identified via rheumatology clinics. A letter explaining the study and requesting that patients invite an FDR to participate in the study will be given to patients during routine appointments or via mail. This letter will include a study invitation and PIS to pass on to an FDR. The invitation will contain a link to the online survey. The first section of the survey will be the PIS and online consent form. FDR Survey participants will be offered an incentive (5 GBP/Euro online gift voucher).

The general population samples will be recruited through online survey panels. Potential respondents will receive an e-mail survey invite with a unique password-protected link to the online survey. The general population sample composition will match the expected FDR sample in terms of age and gender. The initial questions of the survey will be used to confirm the respondent's eligibility. Eligible respondents will be provided the PIS and asked to provide anonymous electronic informed consent to participate. After completing the survey, panel members will be credited with panel points (equivalent to approximately €2-3 for a 30-minute online survey).

### *Statistical considerations and data analysis*

The main outcomes of the stated preference study, will be the: [i] relative preference weights for levels of treatment attributes; [ii] estimated risk equivalents (maximum acceptable risk (MAR) and minimum acceptable benefit (MAB)) for changes in treatment attributes; [iii] potential treatment shares.

For the DCE, a logit-based analysis strategy will be conducted to estimate preferences for attributes of RA prevention therapies including random parameters logit (RPL) modeling and latent class analyses (LCA). Final decisions on the modelling procedure will be made once data collection has been completed. This decision will be based on model fit and clinical interpretive values. Different models might be used to answer the different research questions in this case study. PTT data will be analyzed using imputation and interval regression. The MAR/MAB values for benefits and risks will be calculated and allow comparison between DCE and PTT methods. Heterogeneity of preferences and the impact of participant characteristics (e.g. demographics, RA knowledge, psychological instruments) will be investigated by applying appropriate statistical models including LCA for the DCE and/or subgroup analyses for the DCE (RPL) and PTT methods. For the DCE only the potential treatment shares of currently existing preventive treatment will be calculated. All results described above will be formally compared between the three countries and between FDRs and the general population.

The results of the DCE and PTT will be compared qualitatively and quantitatively. From a quantitative perspective, the MAR and/or MAB will be calculated using each method for a particular benefit and risk attribute over the same range. This allows the average MAR/MAB value and associated 95% confidence intervals to be directly compared. Next, the conditional relative importance of the benefits and harms will be compared across methods. As these methods would evaluate heterogeneity somewhat differently (DCE using LCA/RPL vs. PTT categorizing individual preferences), the comparison of heterogeneity of preferences will be qualitative. The extent to which DCE and PTT results would result in different decisions will be assessed using interviews with stakeholders. Additionally, comparisons will be made regarding logistics of both methods with respect to budget, time, and perceived cognitive load (based on evaluation questions after each method).

### *Patient and Public Involvement*

Patient partners in previous projects highlighted the importance of the clinical objectives of this study. Seven patient research partners provide input on all aspects of this study, including: development of methodological objectives, choice of methods, recruitment procedures, study documents, focus group discussion guide, selection of attributes and levels, selection of psychological measures, survey design and content, interpretation of results, and public dissemination of project findings.

## **Ethics and Dissemination**

### *Ethical Considerations*

It is possible (though unlikely [61]) that participants and patients approached to recruit FDRs might be concerned by the prospect of an enhanced risk of developing RA. We will provide participants with an information booklet developed as part of the EuroTEAM project [62] and

1  
2  
3 which discusses issues around being at risk of RA. English and German versions are currently  
4 available. Sources of further information and contact details for support will also be provided.  
5

6 We will ensure that focus group participants are identified by a participant number, not by  
7 name on both audio recordings and transcripts to protect their privacy. All survey responses  
8 are anonymous. FDRs who complete the survey and wish to receive payment will be directed  
9 to an independent landing page so they can provide email addresses to facilitate payment  
10 without the addresses being linked to survey responses.  
11  
12

### 13 *Regulatory and Protocol Compliance*

14

15 This study has been approved by the London-Hampstead Research Ethics Committee  
16 (19/LO/0407) and the Ethics Committee of the Friedrich-Alexander-Universität Erlangen-  
17 Nürnberg (92\_17 B). The protocol has also been reviewed and approved by the PREFER expert  
18 review board and steering committee. The study will be conducted in compliance with this  
19 protocol; guidelines for Good Clinical Practice (GCP); the Research Governance Framework  
20 for Health and Social Care; and the Data Protection Act 1998. Personal Data protection in this  
21 study will be compliant with the European Union General Data Protection Regulation 2016/679  
22 (GDPR), and the Information Security Policies of the Universities of Birmingham and  
23 Erlangen.  
24  
25

### 26 *Publication and Dissemination Policy*

27

28 Publication of study results will be shared with patient organizations as lay summaries and  
29 submitted to peer reviewed journals in accordance with the PREFER consortium agreement  
30 and International Committee of Medical Journal Editors recommendations[63].  
31  
32  
33  
34  
35  
36  
37

## 38 **References**

39

- 40 1. de Bekker-Grob, E., et al., *Giving Patients' Preferences a Voice in Medical Treatment*  
41 *Life Cycle: The PREFER Public-Private Project*. The Patient: Patient Centred  
42 Outcomes Research, 2017. **10**(3): p. 263-266.
- 43 2. Cook, N.S., J. Cave, and A.-P. Holtorf, *Patient Preference Studies During Early Drug*  
44 *Development: Aligning Stakeholders to Ensure Development Plans Meet Patient*  
45 *Needs*. Frontiers in Medicine, 2019. **6**(82).
- 46 3. Ho, M.P., et al., *Incorporating patient-preference evidence into regulatory decision*  
47 *making*. Surg Endosc, 2015. **29**(10): p. 2984-93.
- 48 4. Vass, C.M. and K. Payne, *Using Discrete Choice Experiments to Inform the Benefit-*  
49 *Risk Assessment of Medicines: Are We Ready Yet?* Pharmacoeconomics, 2017.
- 50 5. Levitan, B., et al., *The Ball is in Your Court: Agenda for Research to Advance the*  
51 *Science of Patient Preferences in the Regulatory Review of Medical Devices in the*  
52 *United States*. Patient, 2017. **10**(5): p. 531-536.
- 53 6. Symmons, D., et al., *The prevalence of rheumatoid arthritis in the United Kingdom:*  
54 *new estimates for a new century*. Rheumatology (Oxford), 2002. **41**(7): p. 793-800.
- 55 7. Silman, A.J. and J.E. Pearson, *Epidemiology and genetics of rheumatoid arthritis*.  
56 *Arthritis Res*, 2002. **4 Suppl 3**: p. S265-72.  
57  
58  
59  
60

- 1
- 2
- 3
- 4 8. Dougados, M., *Comorbidities in rheumatoid arthritis*. *Curr Opin Rheumatol*, 2016. **28**(3): p. 282-8.
- 5
- 6 9. Lopez-Olivo, M.A., et al., *Methotrexate for treating rheumatoid arthritis*. *Cochrane Database Syst Rev*, 2014(6): p. Cd000957.
- 7
- 8 10. Nell, V.P.K., et al., *Benefit of very early referral and very early therapy with disease-modifying anti-rheumatic drugs in patients with early rheumatoid arthritis*. *Rheumatology*, 2004. **43**(7): p. 906-914.
- 9
- 10 11. Raza, K., et al., *Treating very early rheumatoid arthritis*. *Best Practice & Research in Clinical Rheumatology*, 2006. **20**(5): p. 849-863.
- 11
- 12 12. Raza, K., L. Klareskog, and V.M. Holers, *Predicting and preventing the development of rheumatoid arthritis*. *Rheumatology (Oxford)*, 2016. **55**(1): p. 1-3.
- 13
- 14 13. van Steenberghe, H.W., et al., *Preventing progression from arthralgia to arthritis: targeting the right patients*. *Nat Rev Rheumatol*, 2018. **14**(1): p. 32-41.
- 15
- 16 14. Gerlag, D.M., et al., *EULAR recommendations for terminology and research in individuals at risk of rheumatoid arthritis: report from the Study Group for Risk Factors for Rheumatoid Arthritis*. *Annals of the Rheumatic Diseases*, 2012. **71**(5): p. 638-641.
- 17
- 18 15. Bos, W.H., et al., *Effect of dexamethasone on autoantibody levels and arthritis development in patients with arthralgia: a randomised trial*. *Ann Rheum Dis*, 2010. **69**(3): p. 571-4.
- 19
- 20 16. Gerlag, D.M., J.M. Norris, and P.P. Tak, *Towards prevention of autoantibody-positive rheumatoid arthritis: from lifestyle modification to preventive treatment*. *Rheumatology*, 2016. **55**(4): p. 607-614.
- 21
- 22 17. APPIPRA: ISRCTN registry. ISRCTN46017566 Arthritis prevention in the pre-clinical phase of rheumatoid arthritis with abatacept. *BioMed Central* <http://dx.doi.org/10.1186/ISRCTN46017566> [cited 2018 09/08/2018].
- 23
- 24 18. Abatacept Reversing Subclinical Inflammation as Measured by MRI in ACPA Positive Arthralgia (ARIAA). *ClinicalTrials.gov Identifier: NCT02778906*. Available at: <http://clinicaltrials.gov/ct2/show/NCT02778906>.
- 25
- 26 19. Treat Early Arthralgia To Reverse Or Limit Impending Exacerbation to Rheumatoid Arthritis (TREAT EARLIER) [Netherlands Trial Register number NL4599 (NTR4853)]. Available at: <https://www.trialregister.nl/trial/4599>.
- 27
- 28 20. Statins to Prevent Rheumatoid Arthritis (STAPRA) Prevention of Rheumatoid Arthritis by Atorvastatin in Seropositive Arthralgia Patients: a Multicenter Double-Blind Randomized Placebo-Controlled Trial. <http://www.trialregister.nl/trialreg/admin/rctview.asp?TC=5265>.
- 29
- 30 21. StopRA: US National Library of Medicine. *ClinicalTrials.gov* <http://clinicaltrials.gov/ct2/show/NCT02603146>.
- 31
- 32 22. RheumaTolerance for Cure (RTCure) <https://cordis.europa.eu/project/id/777357>.
- 33
- 34 23. Koumantaki, Y., et al., *Family history as a risk factor for rheumatoid arthritis: a case-control study*. *J Rheumatol*, 1997. **24**(8): p. 1522-6.
- 35
- 36 24. Kolfenbach, J.R., et al., *A Prospective Approach to Investigating the Natural History of Pre-Clinical Rheumatoid Arthritis (RA) Using First-Degree Relatives of Probands with RA*. *Arthritis and rheumatism*, 2009. **61**(12): p. 1735-1742.
- 37
- 38 25. Arthritis-Checkup: Study of an early detection of the disease. [http://www.arthritis-checkup.ch/index\\_gb.html](http://www.arthritis-checkup.ch/index_gb.html).
- 39
- 40 26. Pre-clinical Evaluation of Novel Targets in RA (Prevent-RA). <http://www.preventra.net/>.
- 41
- 42
- 43
- 44
- 45
- 46
- 47
- 48
- 49
- 50
- 51
- 52
- 53
- 54
- 55
- 56
- 57
- 58
- 59
- 60

- 1
- 2
- 3
- 4 27. Veldwijk, J., et al., *How psychological distance of a study sample in discrete choice*
- 5 *experiments affects preference measurement: a colorectal cancer screening case*
- 6 *study*. Patient preference and adherence, 2019. **13**: p. 273-282.
- 7 28. Simons, G., et al., *Symptom Recognition and Perceived Urgency of Help-Seeking for*
- 8 *Rheumatoid Arthritis and Other Diseases in the General Public: A Mixed Method*
- 9 *Approach*. Arthritis Care & Research, 2017. **69**(5): p. 633-641.
- 10 29. Simons, G., et al., *Qualitative Exploration of Illness Perceptions of Rheumatoid*
- 11 *Arthritis in the General Public*. Musculoskeletal Care, 2017. **15**(1): p. 13-22.
- 12 30. Stack, R.J., et al., *Perceptions of risk and predictive testing held by the first-degree*
- 13 *relatives of patients with rheumatoid arthritis in England, Austria and Germany: a*
- 14 *qualitative study*. BMJ open, 2016. **6**(6): p. e010555-e010555.
- 15 31. Simons, G., et al., *Perceptions of first-degree relatives of patients with rheumatoid*
- 16 *arthritis about lifestyle modifications and pharmacological interventions to reduce*
- 17 *the risk of rheumatoid arthritis development: a qualitative interview study*. BMC
- 18 *Rheumatology*, 2018. **2**(1): p. 31.
- 19 32. Falahee, M., et al., *Patients' Perceptions of Their Relatives' Risk of Developing*
- 20 *Rheumatoid Arthritis and of the Potential for Risk Communication, Prediction, and*
- 21 *Modulation*. Arthritis Care & Research, 2017. **69**(10): p. 1558-1565.
- 22 33. Munro, S., et al., *Perspectives of patients, first-degree relatives and rheumatologists*
- 23 *on preventive treatments for rheumatoid arthritis: a qualitative analysis*. BMC
- 24 *Rheumatology*, 2018. **2**(1): p. 18.
- 25 34. Falahee, M., et al., *Preferences of Patients and At-risk Individuals for Preventive*
- 26 *Approaches to Rheumatoid Arthritis*. Clinical Therapeutics, 2019. **41**(7): p. 1346-
- 27 1354.
- 28 35. Harrison, M., et al., *Preventing rheumatoid arthritis: Preferences for and predicted*
- 29 *uptake of preventive treatments among high risk individuals*. PLoS One, 2019. **14**(4):
- 30 p. e0216075.
- 31 36. Harrison, M., et al., *Preferences for treatments to prevent rheumatoid arthritis in*
- 32 *Canada and the influence of shared decision-making*. Clin Rheumatol, 2020.
- 33 37. Finckh, A., et al., *Preventive Treatments for Rheumatoid Arthritis: Issues Regarding*
- 34 *Patient Preferences*. Curr Rheumatol Rep, 2016. **18**(8): p. 51.
- 35 38. Clark, M.D., et al., *Discrete Choice Experiments in Health Economics: A Review of*
- 36 *the Literature*. Pharmacoeconomics, 2014. **32**(9): p. 883-902.
- 37 39. Llewellyn-Thomas, H., *Threshold technique*, in *Encyclopedia of medical decision*
- 38 *making*, K. MW, Editor. 2009, Thousand Oaks: Sage. p. 1134-7.
- 39 40. Hauber, B. and J. Coulter, *Using the Threshold Technique to Elicit Patient*
- 40 *Preferences: An Introduction to the Method and an Overview of Existing Empirical*
- 41 *Applications*. Appl Health Econ Health Policy, 2020. **18**(1): p. 31-46.
- 42 41. Russo, S., et al., *Understanding Patients' Preferences: A Systematic Review of*
- 43 *Psychological Instruments Used in Patients' Preference and Decision Studies*. Value
- 44 *Health*, 2019. **22**(4): p. 491-501.
- 45 42. Veldwijk, J., et al., *Preferences for Vaccination: Does Health Literacy Make a*
- 46 *Difference?* Med Decis Making, 2015. **35**(8): p. 948-58.
- 47 43. Hiligsmann, M., et al., *Nominal group technique to select attributes for discrete*
- 48 *choice experiments: an example for drug treatment choice in osteoporosis*. Patient
- 49 *preference and adherence*, 2013. **7**: p. 133-139.
- 50 44. Krueger, R.A. and M.A. Casey, *Focus Groups: A Practical Guide for Applied*
- 51 *Research*. 2014: Sage.
- 52
- 53
- 54
- 55
- 56
- 57
- 58
- 59
- 60



- 1  
2  
3  
4  
5  
6  
7  
8  
9  
10  
11  
12  
13  
14  
15  
16  
17  
18  
19  
20  
21  
22  
23  
24  
25  
26  
27  
28  
29  
30  
31  
32  
33  
34  
35  
36  
37  
38  
39  
40  
41  
42  
43  
44  
45  
46  
47  
48  
49  
50  
51  
52  
53  
54  
55  
56  
57  
58  
59  
60
45. Bridges, J.F.P., et al., *Conjoint Analysis Applications in Health—a Checklist: A Report of the ISPOR Good Research Practices for Conjoint Analysis Task Force*. Value in Health, 2011. **14**(4): p. 403-413.
  46. Reed Johnson, F., et al., *Constructing experimental designs for discrete-choice experiments: report of the ISPOR Conjoint Analysis Experimental Design Good Research Practices Task Force*. Value Health, 2013. **16**(1): p. 3-13.
  47. van de Stadt, L.A., et al., *A prediction rule for the development of arthritis in seropositive arthralgia patients*. Ann Rheum Dis, 2013. **72**(12): p. 1920-6.
  48. Gale, N.K., et al., *Using the framework method for the analysis of qualitative data in multi-disciplinary health research*. BMC Medical Research Methodology, 2013. **13**(1): p. 117.
  49. Hensher, D.A., J.M. Rose, and W.H. Greene, *Applied Choice Analysis*. 2 ed. 2015, Cambridge: Cambridge University Press.
  50. Morris, N.S., et al., *The Single Item Literacy Screener: evaluation of a brief instrument to identify limited reading ability*. BMC Fam Pract, 2006. **7**: p. 21.
  51. McNaughton, C.D., et al., *Validation of a Short, 3-Item Version of the Subjective Numeracy Scale*. Med Decis Making, 2015. **35**(8): p. 932-6.
  52. Broadbent, E., et al., *The Brief Illness Perception Questionnaire*. Journal of Psychosomatic Research, 2006. **60**(6): p. 631-637.
  53. Broadbent, E., et al., *A systematic review and meta-analysis of the Brief Illness Perception Questionnaire*. Psychol Health, 2015. **30**(11): p. 1361-85.
  54. Horne, R., J. Weinman, and M. Hankins, *The beliefs about medicines questionnaire: The development and evaluation of a new method for assessing the cognitive representation of medication*. Psychology & Health, 1999. **14**(1): p. 1-24.
  55. Marshall, D., et al., *Conjoint Analysis Applications in Health - How are Studies being Designed and Reported?: An Update on Current Practice in the Published Literature between 2005 and 2008*. Patient, 2010. **3**(4): p. 249-56.
  56. Louviere, J., D. Hensher, and J. Swait, *Stated Choice Methods; analysis and application*. 2000, Cambridge: Cambridge University Press.
  57. de Bekker-Grob, E.W., et al., *Sample Size Requirements for Discrete-Choice Experiments in Healthcare: a Practical Guide*. Patient, 2015. **8**(5): p. 373-84.
  58. Steures, P., et al., *Patients' preferences in deciding between intrauterine insemination and expectant management*. Hum Reprod, 2005. **20**(3): p. 752-5.
  59. Sung, L., et al., *Inpatient versus outpatient management of low-risk pediatric febrile neutropenia: measuring parents' and healthcare professionals' preferences*. J Clin Oncol, 2004. **22**(19): p. 3922-9.
  60. Dales, R.E., et al., *Intubation and mechanical ventilation for COPD: development of an instrument to elicit patient preferences*. Chest, 1999. **116**(3): p. 792-800.
  61. Marshall, A.A., et al., *Effect of communicating personalized rheumatoid arthritis risk on concern for developing RA: A randomized controlled trial*. Patient Education and Counseling, 2018.
  62. *Towards Early diagnosis and biomarker validation in Arthritis Management*. Final report. FP7-HEALTH project ID 305549. <https://cordis.europa.eu/project/id/305549/reporting>.
  63. International Committee of Medical Journal Editors (ICMJE) (2019). *Recommendations for the Conduct, Reporting, Editing, and Publication of Scholarly Work in Medical Journals*. <http://www.icmje.org/icmje-recommendations.pdf>

## List of Abbreviations

|         |                                                     |
|---------|-----------------------------------------------------|
| bDMARDs | biological Disease-Modifying Anti-Rheumatic Drugs   |
| BWS     | Best Worst Scaling                                  |
| cDMARDs | conventional Disease-Modifying Anti-Rheumatic Drugs |
| DCE     | Discrete Choice Experiment                          |
| EULAR   | European League Against Rheumatism                  |
| FDR     | First-degree relative                               |
| GDPR    | General Data Protection Regulation                  |
| HTA     | Health Technology Assessment                        |
| LCA     | Latent Class Analyses                               |
| MAB     | Minimum Acceptable Benefit                          |
| MAR     | Maximum Acceptable Risk                             |
| NGT     | Nominal Group Technique                             |
| PIS     | Participant Information Sheet                       |
| PTT     | Probabilistic Threshold Technique                   |
| RA      | Rheumatoid Arthritis                                |
| REC     | Research Ethics Committee                           |
| RPL     | Random Parameters Logit                             |

### Authors' contributions

All authors contributed to writing, review and finalization of this protocol. The initial draft was prepared by GS, MF and RD. RD, JV, and CR prepared the initial draft of the preference methods and analysis section.

### Acknowledgements

The authors gratefully acknowledge the patient research partners who have contributed to the design of this study and the support of the Birmingham Rheumatology Research Patient

1  
2  
3 Partnership. We also acknowledge input from the extended team supporting the PREFER RA  
4 case study, particularly Ardine de Wit and Meredith Smith.  
5  
6  
7  
8

### 9 **Funding statement**

10  
11 This study is part of the PREFER project. The Patient Preferences in Benefit-Risk Assessments  
12 during the Medical Product Lifecycle (PREFER) project has received funding from the  
13 Innovative Medicines Initiative 2 Joint Undertaking under grant agreement No 115966. This  
14 Joint Undertaking receives support from the European Union's Horizon 2020 research and  
15 innovation programme and EFPIA.  
16  
17

18 K. Raza is supported by the National Institute of Health Research Birmingham Biomedical  
19 Research Centre.  
20  
21  
22

### 23 **Competing interests statement**

24 MF, GS, LV-M, ME, KSB, UK, BH, and JV have no competing interests to declare.  
25  
26

27 RLD is employed by Janssen Pharmaceuticals and is a shareholder of Johnson & Johnson, Inc.  
28  
29

30 CR is an employee and shareholder of Eli Lilly and Company.  
31  
32

33 STL is employed by Sanofi R&D and is a shareholder of Sanofi.  
34  
35

36 KR reports grants and personal fees from Abbvie, grants and personal fees from Pfizer,  
37 personal fees from Sanofi, personal fees from Lilly, personal fees from Bristol-Myers Squibb,  
38 personal fees from UCB, personal fees from Janssen, and personal fees from Roche Chugai  
39 outside the submitted work  
40  
41  
42  
43  
44  
45  
46  
47  
48  
49  
50  
51  
52  
53  
54  
55  
56  
57  
58  
59  
60

# BMJ Open

## Treatment preferences for preventive interventions for rheumatoid arthritis: Protocol of a mixed methods case study for the Innovative Medicines Initiative PREFER project.

|                                 |                                                                                                                                                                                                                                                                                                                                                                                                                                                                                                                                                                                                                                                                                                                                                 |
|---------------------------------|-------------------------------------------------------------------------------------------------------------------------------------------------------------------------------------------------------------------------------------------------------------------------------------------------------------------------------------------------------------------------------------------------------------------------------------------------------------------------------------------------------------------------------------------------------------------------------------------------------------------------------------------------------------------------------------------------------------------------------------------------|
| Journal:                        | <i>BMJ Open</i>                                                                                                                                                                                                                                                                                                                                                                                                                                                                                                                                                                                                                                                                                                                                 |
| Manuscript ID                   | bmjopen-2020-045851.R1                                                                                                                                                                                                                                                                                                                                                                                                                                                                                                                                                                                                                                                                                                                          |
| Article Type:                   | Protocol                                                                                                                                                                                                                                                                                                                                                                                                                                                                                                                                                                                                                                                                                                                                        |
| Date Submitted by the Author:   | 09-Feb-2021                                                                                                                                                                                                                                                                                                                                                                                                                                                                                                                                                                                                                                                                                                                                     |
| Complete List of Authors:       | Falahee, Marie; University of Birmingham, Institute of Inflammation and Ageing<br>Simons, Gwenda; University of Birmingham, Institute of Inflammation and Ageing<br>DiSantostefano, Rachael; Janssen Pharmaceuticals Inc<br>Valor Méndez, Larissa; Friedrich-Alexander-Universitat Erlangen-Nurnberg<br>Radawski, Christine; Eli Lilly and Company<br>Englbrecht, Matthias; Freelance Healthcare Data Scientist<br>Bywall, Karin; Uppsala Universitet<br>Tcherny-Lessenot, Stephanie; Sanofi SA<br>Kihlbom, Ulrik; Uppsala Universitet<br>Hauber , Brett; RTI Health Solutions, Health Preference Assessment<br>Veldwijk, Jorien; Erasmus Universiteit Rotterdam<br>Raza, Karim; University of Birmingham, Institute of Inflammation and Ageing |
| <b>Primary Subject Heading</b>: | Rheumatology                                                                                                                                                                                                                                                                                                                                                                                                                                                                                                                                                                                                                                                                                                                                    |
| Secondary Subject Heading:      | Health economics, Patient-centred medicine, Research methods                                                                                                                                                                                                                                                                                                                                                                                                                                                                                                                                                                                                                                                                                    |
| Keywords:                       | RHEUMATOLOGY, PREVENTIVE MEDICINE, PUBLIC HEALTH                                                                                                                                                                                                                                                                                                                                                                                                                                                                                                                                                                                                                                                                                                |
|                                 |                                                                                                                                                                                                                                                                                                                                                                                                                                                                                                                                                                                                                                                                                                                                                 |

SCHOLARONE™  
Manuscripts



I, the Submitting Author has the right to grant and does grant on behalf of all authors of the Work (as defined in the below author licence), an exclusive licence and/or a non-exclusive licence for contributions from authors who are: i) UK Crown employees; ii) where BMJ has agreed a CC-BY licence shall apply, and/or iii) in accordance with the terms applicable for US Federal Government officers or employees acting as part of their official duties; on a worldwide, perpetual, irrevocable, royalty-free basis to BMJ Publishing Group Ltd ("BMJ") its licensees and where the relevant Journal is co-owned by BMJ to the co-owners of the Journal, to publish the Work in this journal and any other BMJ products and to exploit all rights, as set out in our [licence](#).

The Submitting Author accepts and understands that any supply made under these terms is made by BMJ to the Submitting Author unless you are acting as an employee on behalf of your employer or a postgraduate student of an affiliated institution which is paying any applicable article publishing charge ("APC") for Open Access articles. Where the Submitting Author wishes to make the Work available on an Open Access basis (and intends to pay the relevant APC), the terms of reuse of such Open Access shall be governed by a Creative Commons licence – details of these licences and which [Creative Commons](#) licence will apply to this Work are set out in our licence referred to above.

Other than as permitted in any relevant BMJ Author's Self Archiving Policies, I confirm this Work has not been accepted for publication elsewhere, is not being considered for publication elsewhere and does not duplicate material already published. I confirm all authors consent to publication of this Work and authorise the granting of this licence.

## Treatment preferences for preventive interventions for rheumatoid arthritis: Protocol of a mixed methods case study for the Innovative Medicines Initiative PREFER project

Marie Falahee<sup>1\*</sup>, Gwenda Simons<sup>1\*</sup>, Rachael L. DiSantostefano<sup>2</sup>, Larissa Valor-Méndez<sup>3</sup>, Christine Radawski<sup>4</sup>, Matthias Englbrecht<sup>5</sup>, Karin Schölin Bywall<sup>6</sup>, Stéphanie Tcherny-Lessenot<sup>7</sup>, Ulrik Kihlbom<sup>6</sup>, Brett Hauber<sup>8,9</sup>, Jorien Veldwijk<sup>10,11</sup>, Karim Raza<sup>1,12,13</sup>.

<sup>1</sup>Institute of Inflammation and Ageing, College of Medical and Dental Sciences, University of Birmingham Research Laboratories, Queen Elizabeth Hospital, Birmingham B15 2WB, UK

<sup>2</sup>Janssen Pharmaceuticals, Titusville, NJ, USA

<sup>3</sup>Department of Internal Medicine and Institute for Clinical Immunology, Friedrich-Alexander-University Erlangen-Nürnberg (FAU) and Universitätsklinikum, Erlangen, Germany

<sup>4</sup>Eli Lilly and Company, Lilly Corporate Center, 893 S Delaware St., Indianapolis, IN 46285, USA

<sup>5</sup>Freelance Healthcare Data Scientist, Eckental, Germany

<sup>6</sup>Centre for Research Ethics & Bioethics, Uppsala University, Husargatan 3, Box 564, 752 37, Uppsala, Sweden

<sup>7</sup>Global Pharmacovigilance and Epidemiology, Sanofi, Paris, France

<sup>8</sup>RTI Health Solutions, Research Triangle Park, NC, USA.

<sup>9</sup>Comparative Health Outcomes, Policy, and Economics (CHOICE) Institute, University of Washington School of Pharmacy, Seattle, WA 98195, USA

<sup>10</sup>Julius Center for Health Sciences and Primary Care, University Medical Center Utrecht, Utrecht University, Utrecht, The Netherlands

<sup>11</sup>School of Health Policy & Management and Erasmus Choice Modelling Centre, Erasmus University Rotterdam, Rotterdam, Netherlands

<sup>12</sup>Department of Rheumatology, Sandwell and West, Birmingham Hospitals NHS Trust, Birmingham, B18 7QH, UK

<sup>13</sup>MRC Versus Arthritis Centre for Musculoskeletal Ageing Research, and Research into Inflammatory Arthritis Centre Versus Arthritis, College of Medical and Dental Sciences, University of Birmingham, B15 2TT, UK

\* Joint first authors

Corresponding author: Marie Falahee, Institute of Inflammation and Ageing, College of Medical and Dental Sciences, University of Birmingham Research Laboratories, Queen Elizabeth Hospital, Birmingham B15 2WB, UK. Email: [m.falahee@bham.ac.uk](mailto:m.falahee@bham.ac.uk)

**Keywords:** Treatment preferences; rheumatoid arthritis; preventive medicine; immunotherapy; drug development; nominal group technique; discrete choice experiment; probabilistic threshold technique

**Word count:** 4017

## Abstract

### Introduction

Amidst growing consensus that stakeholder decision-making during drug development should be informed by an understanding of patient preferences, The Innovative Medicines Initiative project 'Patient Preferences in Benefit-Risk Assessments during the Drug Life Cycle (PREFER)' is developing evidence-based recommendations about how and when patient preferences should be integrated into the drug lifecycle. This protocol describes a PREFER clinical case study which compares two preference elicitation methodologies across several populations and provides information about benefit-risk trade-offs by those at risk of rheumatoid arthritis (RA) for preventive interventions.

### Methods and analysis:

This mixed-methods study will be conducted in three countries (UK, Germany, Romania) to assess preferences of a) first degree relatives (FDRs) of patients with RA, and b) members of the public. Focus groups using nominal group techniques (UK) and ranking surveys (Germany and Romania) will identify and rank key treatment attributes. Focus group transcripts will be analyzed thematically using the framework method, and average rank orders calculated. These results will inform the treatment attributes to be assessed in a survey including a discrete choice experiment (DCE) and a probabilistic threshold technique (PTT). The survey will also include measures of sociodemographic variables, health literacy, numeracy, illness perceptions and beliefs about medicines. The survey will be administered to a) 400 FDRs of RA patients (UK); b) 100 FDRs of RA patients (Germany); c) 1000 members of the public in each of the UK, Germany and Romania. Logit-based approaches will be used to analyze the DCE, and imputation and interval regression for the PTT.

### Ethics and Dissemination:

This study has been approved by the London-Hampstead Research Ethics Committee (19/LO/0407), and the Ethics Committee of the Friedrich-Alexander-Universität Erlangen-Nürnberg (92\_17 B). The protocol has been approved by the PREFER expert review board. The results will be disseminated widely, and will inform the PREFER recommendations.

### Strengths and limitations of this study

- This study has been developed by an international, multidisciplinary team of academic, clinical, pharmaceutical industry and patient partners, and provides an example of a rigorously designed treatment preference study that is informative for a range of stakeholders.
- This study addresses both clinical and methodological research objectives, and the findings will contribute to both the development of efficient prevention strategies for RA and the development of best practice on the integration of patient preferences into drug development.
- This study involves a substantial sample size across several populations allowing comparison of treatment preferences, psychological variables and sociodemographic information across populations in three European countries.
- This is the first quantitative study of preferences for preventive treatments for rheumatoid arthritis (RA) involving a large sample of confirmed, rather than self-reported, first degree relatives of patients with a clinician confirmed diagnosis of RA.
- This study recruits first degree relatives indirectly via invitations passed on by patients with a confirmed diagnosis of RA, and may therefore be open to selection bias at both patient and participant level.



## Introduction

There is increasing agreement that decision-making by the pharmaceutical industry, regulators, and health technology assessment (HTA) bodies throughout the development of medical products should be informed by an understanding of patient preferences, and that guidance on best practice is required.[1-4] This study is a case study for the Innovative Medicines Initiative (IMI) project ‘Patient Preferences in Benefit-Risk Assessments during the Medical Product Lifecycle’ (PREFER). PREFER aims to strengthen patient-centric decision-making products by developing evidence-based recommendations to guide stakeholders on how and when patient preference studies should inform decision-making.

There are many methodological research questions that warrant further study in preference research.[5] PREFER conducted a landscape assessment to identify the most important questions and pair them with clinical case studies, based on the disease under investigation, anticipated sample size, and clinical research objectives. The results of these studies will inform the development of recommendations for conducting preference studies. The background to both the clinical and methodological questions addressed in the present study is outlined below.

### *Clinical background*

Rheumatoid arthritis (RA) is a common chronic destructive polyarthritis, affecting approximately 1% of the general population [6, 7]. Typical age of onset is between 40 to 60 years old, although it can begin at much younger and older ages. If untreated, RA causes joint damage and disability. RA is associated with significant extra-articular manifestations reducing life expectancy by approximately 10 years [8].

It is not currently possible to cure RA and long-term treatment is usually required. Available treatments include conventional (c), biological (b) and targeted synthetic (ts) disease-modifying anti-rheumatic drugs (DMARDs), with varying benefit-risk profiles. The mainstay of treatment is methotrexate, a relatively inexpensive cDMARD to which approximately one third of patients respond well [9]. For those who do not respond well to first-line treatment, the use of a combination of cDMARDs and the addition of more (expensive) bDMARDs may be employed. Prolonged use of cDMARDs and bDMARDs is associated with considerable risk, including risk of infection and of lung, liver and haematological toxicity [9].

Very early treatment of RA is associated with improved outcomes [10, 11]. There is now an emerging research focus on treating ‘at risk’ individuals in the preclinical and earliest clinically apparent phases of RA [12, 13] to assess whether a relatively short course of therapy will prevent or delay the onset of RA. EULAR recommendations identify terminology to describe groups of participants appropriate for prospective trials: individuals without RA having: (i) genetic risk factors for RA; (ii) environmental risk factors for RA; (iii) systemic autoimmunity associated with RA; (iv) symptoms without clinical arthritis (arthralgia); or (v) unclassified arthritis [14].

Two completed [15, 16]; and five ongoing (APPIPRA [17]; ARIAA [18]; TREAT EARLIER [19]; STAPRA [20]; SToPRA [21]) proof-of-concept trials are assessing the effectiveness of drugs currently used to treat RA to prevent or delay the onset of RA in one or more of these ‘at risk’ groups. Novel immune tolerising therapies are also being investigated in another IMI project, ‘RheumaTolerance for Cure’ [22].

1  
2  
3 While members of the general population have a 1/100 probability of developing RA, first-  
4 degree relatives (FDRs; EULAR ‘at risk’ stages i-ii) of existing patients are four times more  
5 likely to develop RA in the future [23]. FDRs are therefore likely candidates for preventive  
6 approaches. For example, the SToPRA trial (evaluating the preventive effectiveness of a 12  
7 month course of hydroxychloroquine [21]) is recruiting asymptomatic FDRs of RA patients  
8 and individuals attending health fairs who are auto-antibody positive (EULAR ‘at risk’ stages  
9 i-iii).

10  
11  
12 Understanding the treatment preferences of ‘at risk’ groups is especially important in  
13 preventive contexts, where there is uncertainty regarding: treatment effectiveness and safety  
14 (as per standard patient preference studies); and also the individual’s baseline risk of  
15 developing RA in the future, the timeline for that risk and the likely future severity of disease.  
16 As prospective studies elucidate biomarkers predictive of RA development, risk stratification  
17 of healthy individuals is increasingly likely to facilitate early treatment and preventive  
18 interventions [24-26]. As prevention research evolves, knowledge of the preferences of ‘at risk’  
19 individuals around RA treatments repurposed for prevention and (as yet) hypothetical new ones  
20 will be valuable to inform the development and regulation of efficient and effective preventive  
21 interventions for RA.  
22  
23

24  
25 It is also of value to understand treatment preferences in the general public who are asked to  
26 imagine being at an elevated risk of developing RA. The assessment of preferences of FDRs at  
27 increased risk of RA and a general population that is told to assume an increased risk of RA  
28 allows for comparisons between groups that are expected to vary in their familiarity with and  
29 understanding of RA [27]. Public misperceptions around the identity and severity of RA are  
30 common [28, 29].  
31

32  
33 A small number of qualitative studies have explored perceptions of preventive intervention for  
34 RA [30-33], but quantitative evidence is limited [34]. A discrete choice experiment (DCE)  
35 assessing preferences for preventive pharmacological interventions for RA of 288 self-reported  
36 FDRs recruited via Amazon Mechanical Turk, suggested that mode of administration may be  
37 an important determinant of preventive treatment acceptability [35]. This finding was echoed  
38 in a subsequent study that included 30 self-reported FDRs [36]. However, a best-worst scaling  
39 pilot study found that the effectiveness and risks of preventive treatments were more important  
40 than mode of administration for a small sample of 34 FDRs taking part in a prospective cohort  
41 study [37]. Further quantitative evidence is needed in clinically validated populations and  
42 larger samples. The primary clinical objective of this preference study is therefore to establish  
43 the preferences of ‘at risk’ individuals (i.e., children or siblings of confirmed RA patients) and  
44 the general public for preventive therapies for RA.  
45  
46

#### 47 *Methodological background*

48

49  
50 PREFER has identified a number of methodological questions for which evidence is currently  
51 lacking. This case study will provide evidence to address several methodological questions in  
52 line with PREFER strategy. Firstly, there is no consensus on which is the best method to gather  
53 quantitative treatment preference data, and multiple techniques ranging from simple ranking  
54 exercises to complex, resource intensive trade-off methods are employed. PREFER seeks to  
55 assess how similar the results of simpler/faster/cheaper methods are compared to more  
56 rigorous/in depth/expensive preference methods involving the same set of treatment attributes.  
57 This case study will compare preferences for preventive treatments elicited by a DCE [38] and  
58 probabilistic threshold technique (PTT) [39, 40].  
59  
60

1  
2  
3 In a typical DCE, respondents are asked to complete several 'choice tasks'. Each consists of  
4 choosing between two or more alternatives that describe a treatment (or no treatment). The  
5 description of the treatment is based on its characteristics, or 'attributes'. The individual's  
6 preference for an alternative can be determined based on the values of the levels of the included  
7 attributes across the choice tasks. The Probabilistic Threshold Technique (PTT) has a similar,  
8 but simpler choice task as the DCE. Rather than varying all attribute levels according to an  
9 experimental design, individuals choose between a reference treatment profile and an  
10 alternative treatment where only one attribute is improved or made worse until the participant  
11 changes their choice from one profile to the other. The point at which the participant switches  
12 their choice is the threshold. The PTT is simpler in that it does not require an experimental  
13 design, specialized analytical or design software, or complex multivariate conditional models.  
14 This study will determine the extent to which results using the PTT differ from results of the  
15 relatively complex DCE. The DCE attributes and levels will be determined first, and the PTT  
16 alternatives will be chosen based on the DCE attributes and levels, including which attribute to  
17 modify. The exact selection and formulation of the attributes included in both choice methods  
18 will be based on a previous qualitative research phase.  
19  
20  
21

22 A further PREFER objective is to investigate the relationship between measures of  
23 psychological constructs and preference heterogeneity. In order to do so, this study will assess  
24 whether measures of psychological constructs (i.e., perceived risk, beliefs about medicines,  
25 illness perceptions) can explain preference heterogeneity, as evidence in this area is limited  
26 [41]. Other measures such as health literacy, and numeracy might also explain preference  
27 heterogeneity, and could impact preference construction (i.e., leading to differences in choice  
28 consistency, certainty etc.) [42] and will also be assessed.  
29  
30  
31

32 The current case study will take place in the same format in the UK, Germany and Romania  
33 enabling comparisons across countries, thus addressing a further PREFER methodological  
34 objective, and elucidating the transferability of preferences across regions. Finally, as most  
35 current intervention trials in individuals at risk of RA are targeting patients with early  
36 symptoms (e.g., joint pain) and elevated RA related autoantibodies, the current case study will  
37 ask FDR participants to imagine they have started to develop joint symptoms and have had  
38 blood tests, which indicate that they are at high risk of developing RA within two years.  
39 Similarly, members of the general population will be asked to imagine the same scenario. This  
40 will allow assessment of whether the FDRs respond systematically differently than members  
41 of the general public. This will address PREFER questions related to both the generalizability  
42 of preferences from one specific population in a disease to different populations.  
43  
44  
45  
46  
47

## 48 **Methods and analysis**

49 This study will consist of 2 phases. A focus group/interview study using Nominal Group  
50 Technique (NGT) [43] in the UK with confirmatory ranking surveys in Germany and Romania  
51 will be conducted to explore attributes relevant to decision-making about treatments to prevent  
52 RA, and inform the selection and definition of attributes to be used in a quantitative study. This  
53 will be followed by a stated preference survey to assess treatment preferences of FDRs and the  
54 general population (Figure 1).  
55  
56

57 We will employ evidence-based guidelines and best practices for study design and conduct,  
58 including focus groups [44], nominal group techniques [43], and for preference study design  
59 and analysis [45, 46]  
60

### *Focus group/ interview study*

The outcomes of the focus group/interview study will be: [i] a description of themes that are important considerations for decision making about preventive treatment for RA; [ii] a list of treatment attributes relevant for decision making, and their rank order.

We aim to conduct four focus groups: two with FDRs, and two with the general population in the UK. Each focus group will have approximately five to seven respondents. Four focus groups are expected to be sufficient to generate attributes since focus groups have been shown to yield concept saturation after two to four group discussions [44]. All participants will be aged 18 years or older. Focus group participants will be offered £20 as an incentive. Focus groups will take place at the University of Birmingham, UK.

Members of the general population will be invited to the focus group through an advert on community message boards and online research recruitment platforms. FDRs will be recruited indirectly, through patients with RA identified at outpatient clinics at participating sites. Patients with RA attending rheumatology clinic will be invited to pass on a study invitation to their FDR. All focus group participants will provide informed consent before taking part, facilitated by a participant information sheet (PIS).

To increase consistency across focus groups, a semi-structured interview guide with questions about characteristics that might be expected in a preventive treatment for RA will be developed. The guide will be developed with clinical expert input and an international panel of patient research partners and informed by a review of the literature. Any treatment attributes that have featured across previous studies of preferences for RA treatments that are not identified during the initial discussion will be introduced to participants for further discussion. NGT[43] will be used to obtain rankings of attributes identified in the focus group by their relative importance to inform the preference study design.

We will ask focus group participants to imagine they have started to develop joint pain and have had a blood test that indicates they have a 40% risk to develop RA in the next 2 years. This is representative of participants included in current trials of preventive interventions for RA, whose risk of developing RA within 2 years is between 10% and 60% depending on the presence of other risk factors[47].

The focus group discussions will be audio recorded and transcribed verbatim. The transcripts will be analyzed using the Framework Method [48]. At least 20% of transcripts will be independently coded by multiple researchers to develop a coding framework with input from patient research partners. At least two researchers will independently code each transcript applying the agreed framework.

Analysis of transcripts will proceed at the same time as data collection. When there is consensus amongst the research team that thematic saturation has been achieved and no new treatment attributes are being identified, no new focus groups will be scheduled. The original list of attributes used for the ranking exercises in the NGT, will then be included in a ranking survey for FDRs and members of the general public in Germany (N=30) and members of the general public in Romania (N=30). This survey aims to confirm/validate the selection of the most important treatment attributes across all countries involved in the quantitative study. The attribute rankings and focus groups findings will then be reviewed with clinical and methodological experts and patient partners to select those appropriate for inclusion in a DCE,

1  
2  
3 and a representative range of levels for each attribute will be selected. Any high-ranking  
4 attributes that are not included in the DCE (e.g., because of likely dominance) will be included  
5 (at a constant level) in the survey choice task setting.  
6  
7  
8  
9

### 10 *Stated preference study*

11  
12 The attributes and levels identified above will be incorporated into a survey containing both a  
13 DCE and PTT. Both approaches will assess preferences for RA preventive treatments by asking  
14 respondents to choose between treatment alternatives. Each treatment will be described in  
15 terms of its level of each attribute. The order of presentation (DCE followed by PTT, or vice  
16 versa) will be randomized.  
17

18  
19 The combinations of attribute levels that define each profile and the set of profiles in each  
20 choice question in a DCE are known as the experimental design. The experimental design must  
21 have statistical properties that allow estimation of the preference weights of interest. This study  
22 will use Ngene (ChoiceMetrics, Sydney, Australia) to construct a Bayesian D-efficient  
23 fractional-factorial experimental design [49]. Prior information on the importance of the  
24 attributes will be based on previous literature and best guesses for a pilot study, and outcomes  
25 of initial analysis (conditional logit) of pilot data for the main survey.  
26  
27

### 28 *Survey instrument*

29 All participants will provide informed consent before completing the survey. Respondents will  
30 complete a demographic questionnaire and assess their perceived risk of developing RA. They  
31 will be asked to read a description of RA and risk factors for RA developed with clinical experts  
32 and patient partners. Respondents will then be asked to imagine they have started to develop  
33 joint pain and have had a blood test that indicates they have an elevated risk of developing RA  
34 in the next 2 years. This will be followed by evaluation questions, including warm up and  
35 knowledge questions to test participant understanding of the information presented. For  
36 example, the participant may be shown a risk grid to test understanding of percentages, with 3  
37 persons selected and 97 persons not selected to test understanding of 3% or 3 in 100. This will  
38 be followed by either the DCE/PPT choice task questions, which will be preceded by a guided  
39 'walk through' demonstration of a DCE/PTT choice task and some warm-up questions. To  
40 avoid carry-over effects from DCE to PTT or vice versa, respondents will then complete the  
41 Single Item Literacy Screener (SILS[50]) and the 3-item version of the Subjective Numeracy  
42 Scale (SNS- 3[51]). This will be followed by a guided example and evaluation questions for  
43 the choice tasks of the second method, followed by the actual choice tasks. Participants will  
44 then complete the Brief Illness Perception Questionnaire (B-IPQ)[52, 53] and the Beliefs about  
45 Medicines Questionnaire-General (BMQ-General)[54]. On completion of the survey,  
46 participants will be provided with sources of additional information about RA and risk factors  
47 for RA.  
48  
49  
50

51  
52 The survey will be pre-tested in a convenience sample (N=15) using qualitative think aloud  
53 interviews. These participants will be paid 20 GBP/Euro in shopping vouchers. To inform the  
54 final experimental design and optimize statistical efficiency a survey pilot will be conducted  
55 with 100 members of the general public in the UK.  
56  
57  
58  
59  
60

### *Survey sample*

We aim to recruit a total of 3,500 participants who have not received a diagnosis of RA, including:

- 400 adults who are FDRs of an individual with a confirmed diagnosis of RA, UK
- 100 adults who are FDRs of an individual with a confirmed diagnosis of RA, Germany
- 1000 adults from the general population, UK survey panel
- 1000 adults from the general population, Germany survey panel
- 1000 adults from the general population, Romania survey panel

All participants will be asked to assume an increased risk of developing RA in the next 2 years.

A priori sample-size calculations represent a challenge in DCE experiments. Most published studies have a sample size of 100 to 300 respondents [55]. However, the minimum sample size depends on several criteria, including question format, choice task complexity, desired precision of results, and subgroup analyses [46, 56]. A method for computing sample size was proposed by de Bekker-Grob [57], however, as the article highlights, there is no analytic solution or power calculation that can be used to determine the appropriate sample size for a DCE unless enough information to inform the selection of priors exists.

There is no specific power calculation to determine sample size in PTT studies without knowing the expected threshold value a priori. Most PTT studies are conducted with 100 or fewer respondents, and substantially smaller samples (between 20 and 42 respondents) have been used successfully in previous studies [57-60]. Given the lack of clear guidance on sample size estimation for PTT we assume that a minimum sample size of 50 per PTT choice set would be needed to estimate a threshold value in each threshold exercise. To account for potential heterogeneity, a minimum total sample size of 100 will be considered sufficient to answer the primary objective. A target sample size of 200 is sufficient for the purposes of conducting subgroup analyses.

A sample of 250 first degree relatives should provide enough information to address the key clinical research objective with acceptable precision [55]. An increased sample size of 400 will allow increased precision of estimates for other comparisons. Based on the sample size requirements for both methods and accounting for the number of additional methodological research questions this study anticipates to answer, a sample size of 1000 from a general population panel in each country should provide enough information to enable comparisons across groups and methods with acceptable precision.

### *Sample Identification and Eligibility*

FDRs will be recruited through patients with a confirmed diagnosis of RA identified via rheumatology clinics. A letter explaining the study and requesting that patients invite an FDR to participate in the study will be given to patients during routine appointments or via mail. This letter will include a study invitation and PIS to pass on to an FDR. The invitation will contain a link to the online survey. The first section of the survey will be the PIS and online consent form. FDR Survey participants will be offered an incentive (5 GBP/Euro online gift voucher).

The general population samples will be recruited through online survey panels. Potential respondents will receive an e-mail survey invite with a unique password-protected link to the

1  
2  
3 online survey. The general population sample composition will match the expected FDR  
4 sample in terms of age and gender. The initial questions of the survey will be used to confirm  
5 the respondent's eligibility. Eligible respondents will be provided the PIS and asked to provide  
6 anonymous electronic informed consent to participate. After completing the survey, panel  
7 members will be credited with panel points (equivalent to approximately €2-3 for a 30-minute  
8 online survey).  
9

### 10 *Statistical considerations and data analysis*

11  
12  
13 The main outcomes of the stated preference study, will be the: [i] relative preference weights  
14 for levels of treatment attributes; [ii] estimated risk equivalents (maximum acceptable risk  
15 (MAR) and minimum acceptable benefit (MAB)) for changes in treatment attributes; [iii]  
16 potential treatment shares.  
17

18  
19 For the DCE, a logit-based analysis strategy will be conducted to estimate preferences for  
20 attributes of RA prevention therapies including random parameters logit (RPL) modeling and  
21 latent class analyses (LCA). Final decisions on the modelling procedure will be made once data  
22 collection has been completed. This decision will be based on model fit and clinical interpretive  
23 values. Different models might be used to answer the different research questions in this case  
24 study. PTT data will be analyzed using imputation and interval regression. The MAR/MAB  
25 values for benefits and risks will be calculated and allow comparison between DCE and PTT  
26 methods. Heterogeneity of preferences and the impact of participant characteristics (e.g.  
27 demographics, RA knowledge, psychological instruments) will be investigated by applying  
28 appropriate statistical models including LCA for the DCE and/or subgroup analyses for the  
29 DCE (RPL) and PTT methods. For the DCE only the potential treatment shares of currently  
30 existing preventive treatment will be calculated. All results described above will be formally  
31 compared between the three countries and between FDRs and the general population.  
32  
33

34  
35 The results of the DCE and PTT will be compared qualitatively and quantitatively. From a  
36 quantitative perspective, the MAR and/or MAB will be calculated using each method for a  
37 particular benefit and risk attribute over the same range. This allows the average MAR/MAB  
38 value and associated 95% confidence intervals to be directly compared. Next, the conditional  
39 relative importance of the benefits and harms will be compared across methods. As these  
40 methods would evaluate heterogeneity somewhat differently (DCE using LCA/RPL vs. PTT  
41 categorizing individual preferences), the comparison of heterogeneity of preferences will be  
42 qualitative. The extent to which DCE and PTT results would result in different decisions will  
43 be assessed using interviews with stakeholders. Additionally, comparisons will be made  
44 regarding logistics of both methods with respect to budget, time, and perceived cognitive load  
45 (based on evaluation questions after each method).  
46  
47

### 48 *Patient and Public Involvement*

49  
50  
51 Patient partners in previous projects highlighted the importance of the clinical objectives of  
52 this study. Seven patient research partners provide input on all aspects of this study, including:  
53 development of methodological objectives, choice of methods, recruitment procedures, study  
54 documents, focus group discussion guide, selection of attributes and levels, selection of  
55 psychological measures, survey design and content, interpretation of results, and public  
56 dissemination of project findings.  
57  
58  
59  
60

## Ethics and Dissemination

### *Ethical Considerations*

It is possible (though unlikely [61]) that participants and patients approached to recruit FDRs might be concerned by the prospect of an enhanced risk of developing RA. We will provide participants with an information booklet developed as part of the EuroTEAM project [62] and which discusses issues around being at risk of RA. English and German versions are currently available. Sources of further information and contact details for support will also be provided.

We will ensure that focus group participants are identified by a participant number, not by name on both audio recordings and transcripts to protect their privacy. All survey responses are anonymous. FDRs who complete the survey and wish to receive payment will be directed to an independent landing page so they can provide email addresses to facilitate payment without the addresses being linked to survey responses.

### *Regulatory and Protocol Compliance*

This study has been approved by the London-Hampstead Research Ethics Committee (19/LO/0407) and the Ethics Committee of the Friedrich-Alexander-Universität Erlangen-Nürnberg (92\_17 B). The protocol has also been reviewed and approved by the PREFER expert review board and steering committee. The study will be conducted in compliance with this protocol; guidelines for Good Clinical Practice (GCP); the Research Governance Framework for Health and Social Care; and the Data Protection Act 1998. Personal Data protection in this study will be compliant with the European Union General Data Protection Regulation 2016/679 (GDPR), and the Information Security Policies of the Universities of Birmingham and Erlangen.

### *Publication and Dissemination Policy*

Publication of study results will be shared with patient organizations as lay summaries and submitted to peer reviewed journals in accordance with the PREFER consortium agreement and International Committee of Medical Journal Editors recommendations[63].

## References

1. de Bekker-Grob, E., et al., *Giving Patients' Preferences a Voice in Medical Treatment Life Cycle: The PREFER Public-Private Project*. The Patient: Patient Centred Outcomes Research, 2017. **10**(3): p. 263-266.
2. Cook, N.S., J. Cave, and A.-P. Holtorf, *Patient Preference Studies During Early Drug Development: Aligning Stakeholders to Ensure Development Plans Meet Patient Needs*. Frontiers in Medicine, 2019. **6**(82).
3. Ho, M.P., et al., *Incorporating patient-preference evidence into regulatory decision making*. Surg Endosc, 2015. **29**(10): p. 2984-93.
4. Vass, C.M. and K. Payne, *Using Discrete Choice Experiments to Inform the Benefit-Risk Assessment of Medicines: Are We Ready Yet?* PharmacoEconomics, 2017.



- 1
  - 2
  - 3
  - 4
  - 5
  - 6
  - 7
  - 8
  - 9
  - 10
  - 11
  - 12
  - 13
  - 14
  - 15
  - 16
  - 17
  - 18
  - 19
  - 20
  - 21
  - 22
  - 23
  - 24
  - 25
  - 26
  - 27
  - 28
  - 29
  - 30
  - 31
  - 32
  - 33
  - 34
  - 35
  - 36
  - 37
  - 38
  - 39
  - 40
  - 41
  - 42
  - 43
  - 44
  - 45
  - 46
  - 47
  - 48
  - 49
  - 50
  - 51
  - 52
  - 53
  - 54
  - 55
  - 56
  - 57
  - 58
  - 59
  - 60
5. Levitan, B., et al., *The Ball is in Your Court: Agenda for Research to Advance the Science of Patient Preferences in the Regulatory Review of Medical Devices in the United States*. Patient, 2017. **10**(5): p. 531-536.
  6. Symmons, D., et al., *The prevalence of rheumatoid arthritis in the United Kingdom: new estimates for a new century*. Rheumatology (Oxford), 2002. **41**(7): p. 793-800.
  7. Silman, A.J. and J.E. Pearson, *Epidemiology and genetics of rheumatoid arthritis*. Arthritis Res, 2002. **4 Suppl 3**: p. S265-72.
  8. Dougados, M., *Comorbidities in rheumatoid arthritis*. Curr Opin Rheumatol, 2016. **28**(3): p. 282-8.
  9. Lopez-Olivo, M.A., et al., *Methotrexate for treating rheumatoid arthritis*. Cochrane Database Syst Rev, 2014(6): p. Cd000957.
  10. Nell, V.P.K., et al., *Benefit of very early referral and very early therapy with disease-modifying anti-rheumatic drugs in patients with early rheumatoid arthritis*. Rheumatology, 2004. **43**(7): p. 906-914.
  11. Raza, K., et al., *Treating very early rheumatoid arthritis*. Best Practice & Research in Clinical Rheumatology, 2006. **20**(5): p. 849-863.
  12. Raza, K., L. Klareskog, and V.M. Holers, *Predicting and preventing the development of rheumatoid arthritis*. Rheumatology (Oxford), 2016. **55**(1): p. 1-3.
  13. van Steenberghe, H.W., et al., *Preventing progression from arthralgia to arthritis: targeting the right patients*. Nat Rev Rheumatol, 2018. **14**(1): p. 32-41.
  14. Gerlag, D.M., et al., *EULAR recommendations for terminology and research in individuals at risk of rheumatoid arthritis: report from the Study Group for Risk Factors for Rheumatoid Arthritis*. Annals of the Rheumatic Diseases, 2012. **71**(5): p. 638-641.
  15. Bos, W.H., et al., *Effect of dexamethasone on autoantibody levels and arthritis development in patients with arthralgia: a randomised trial*. Ann Rheum Dis, 2010. **69**(3): p. 571-4.
  16. Gerlag, D.M., J.M. Norris, and P.P. Tak, *Towards prevention of autoantibody-positive rheumatoid arthritis: from lifestyle modification to preventive treatment*. Rheumatology, 2016. **55**(4): p. 607-614.
  17. Al-Laith M., et al, *Arthritis prevention in the pre-clinical phase of RA with abatacept (the APIPPRA study): a multi-centre, randomised, double-blind, parallel-group, placebo-controlled clinical trial protocol*. Trials. 2019 Jul 15;20(1):429. doi: 10.1186/s13063-019-3403-7.
  18. Abatacept Reversing Subclinical Inflammation as Measured by MRI in ACPA Positive Arthralgia (ARIAA). ClinicalTrials.gov Identifier: NCT02778906. Available at: <http://clinicaltrials.gov/ct2/show/NCT02778906>.
  19. Niemantsverdriet E., et al, *TREAT Early Arthralgia to Reverse or Limit Impending Exacerbation to Rheumatoid arthritis (TREAT EARLIER): a randomized, double-blind, placebo-controlled clinical trial protocol*. Trials. 2020;21(1):862.20. van Boheemen L., et al. *The STatins to Prevent Rheumatoid Arthritis (STAPRA) Trial: Clinical Results and Subsequent Qualitative Study, a Mixed Method Evaluation* Arthritis Rheumatol 2020;72 (suppl 10).
  21. StopRA: US National Library of Medicine. ClinicalTrials.gov <http://clinicaltrials.gov/ct2/show/NCT02603146>.
  22. RheumaTolerance for Cure (RTCure) <https://cordis.europa.eu/project/id/777357>.
  23. Koumantaki, Y., et al., *Family history as a risk factor for rheumatoid arthritis: a case-control study*. J Rheumatol, 1997. **24**(8): p. 1522-6.

- 1
  - 2
  - 3
  - 4
  - 5
  - 6
  - 7
  - 8
  - 9
  - 10
  - 11
  - 12
  - 13
  - 14
  - 15
  - 16
  - 17
  - 18
  - 19
  - 20
  - 21
  - 22
  - 23
  - 24
  - 25
  - 26
  - 27
  - 28
  - 29
  - 30
  - 31
  - 32
  - 33
  - 34
  - 35
  - 36
  - 37
  - 38
  - 39
  - 40
  - 41
  - 42
  - 43
  - 44
  - 45
  - 46
  - 47
  - 48
  - 49
  - 50
  - 51
  - 52
  - 53
  - 54
  - 55
  - 56
  - 57
  - 58
  - 59
  - 60
24. Kolfenbach, J.R., et al., *A Prospective Approach to Investigating the Natural History of Pre-Clinical Rheumatoid Arthritis (RA) Using First-Degree Relatives of Probands with RA*. Arthritis and rheumatism, 2009. **61**(12): p. 1735-1742.
25. Arthritis-Checkup: Study of an early detection of the disease. [http://www.arthritis-checkup.ch/index\\_gb.html](http://www.arthritis-checkup.ch/index_gb.html).
26. Pre-clinical Evaluation of Novel Targets in RA (Prevent-RA). <http://www.preventra.net/>.
27. Veldwijk, J., et al., *How psychological distance of a study sample in discrete choice experiments affects preference measurement: a colorectal cancer screening case study*. Patient preference and adherence, 2019. **13**: p. 273-282.
28. Simons, G., et al., *Symptom Recognition and Perceived Urgency of Help-Seeking for Rheumatoid Arthritis and Other Diseases in the General Public: A Mixed Method Approach*. Arthritis Care & Research, 2017. **69**(5): p. 633-641.
29. Simons, G., et al., *Qualitative Exploration of Illness Perceptions of Rheumatoid Arthritis in the General Public*. Musculoskeletal Care, 2017. **15**(1): p. 13-22.
30. Stack, R.J., et al., *Perceptions of risk and predictive testing held by the first-degree relatives of patients with rheumatoid arthritis in England, Austria and Germany: a qualitative study*. BMJ open, 2016. **6**(6): p. e010555-e010555.
31. Simons, G., et al., *Perceptions of first-degree relatives of patients with rheumatoid arthritis about lifestyle modifications and pharmacological interventions to reduce the risk of rheumatoid arthritis development: a qualitative interview study*. BMC Rheumatology, 2018. **2**(1): p. 31.
32. Falahee, M., et al., *Patients' Perceptions of Their Relatives' Risk of Developing Rheumatoid Arthritis and of the Potential for Risk Communication, Prediction, and Modulation*. Arthritis Care & Research, 2017. **69**(10): p. 1558-1565.
33. Munro, S., et al., *Perspectives of patients, first-degree relatives and rheumatologists on preventive treatments for rheumatoid arthritis: a qualitative analysis*. BMC Rheumatology, 2018. **2**(1): p. 18.
34. Falahee, M., et al., *Preferences of Patients and At-risk Individuals for Preventive Approaches to Rheumatoid Arthritis*. Clinical Therapeutics, 2019. **41**(7): p. 1346-1354.
35. Harrison, M., et al., *Preventing rheumatoid arthritis: Preferences for and predicted uptake of preventive treatments among high risk individuals*. PLoS One, 2019. **14**(4): p. e0216075.
36. Harrison, M., et al., *Preferences for treatments to prevent rheumatoid arthritis in Canada and the influence of shared decision-making*. Clin Rheumatol, 2020.
37. Finckh, A., et al., *Preventive Treatments for Rheumatoid Arthritis: Issues Regarding Patient Preferences*. Curr Rheumatol Rep, 2016. **18**(8): p. 51.
38. Clark, M.D., et al., *Discrete Choice Experiments in Health Economics: A Review of the Literature*. PharmacoEconomics, 2014. **32**(9): p. 883-902.
39. Llewellyn-Thomas, H., *Threshold technique*, in *Encyclopedia of medical decision making*, K. MW, Editor. 2009, Thousand Oaks: Sage. p. 1134-7.
40. Hauber, B. and J. Coulter, *Using the Threshold Technique to Elicit Patient Preferences: An Introduction to the Method and an Overview of Existing Empirical Applications*. Appl Health Econ Health Policy, 2020. **18**(1): p. 31-46.
41. Russo, S., et al., *Understanding Patients' Preferences: A Systematic Review of Psychological Instruments Used in Patients' Preference and Decision Studies*. Value Health, 2019. **22**(4): p. 491-501.
42. Veldwijk, J., et al., *Preferences for Vaccination: Does Health Literacy Make a Difference?* Med Decis Making, 2015. **35**(8): p. 948-58.

- 1
- 2
- 3
- 4 43. Hiligsmann, M., et al., *Nominal group technique to select attributes for discrete*
- 5 *choice experiments: an example for drug treatment choice in osteoporosis*. Patient
- 6 preference and adherence, 2013. **7**: p. 133-139.
- 7
- 8 44. Krueger, R.A. and M.A. Casey, *Focus Groups: A Practical Guide for Applied*
- 9 *Research*. 2014: Sage.
- 10
- 11 45. Bridges, J.F.P., et al., *Conjoint Analysis Applications in Health—a Checklist: A*
- 12 *Report of the ISPOR Good Research Practices for Conjoint Analysis Task Force*.
- 13 Value in Health, 2011. **14**(4): p. 403-413.
- 14
- 15 46. Reed Johnson, F., et al., *Constructing experimental designs for discrete-choice*
- 16 *experiments: report of the ISPOR Conjoint Analysis Experimental Design Good*
- 17 *Research Practices Task Force*. Value Health, 2013. **16**(1): p. 3-13.
- 18
- 19 47. van de Stadt, L.A., et al., *A prediction rule for the development of arthritis in*
- 20 *seropositive arthralgia patients*. Ann Rheum Dis, 2013. **72**(12): p. 1920-6.
- 21
- 22 48. Gale, N.K., et al., *Using the framework method for the analysis of qualitative data in*
- 23 *multi-disciplinary health research*. BMC Medical Research Methodology, 2013.
- 24 **13**(1): p. 117.
- 25
- 26 49. Hensher, D.A., J.M. Rose, and W.H. Greene, *Applied Choice Analysis*. 2 ed. 2015,
- 27 Cambridge: Cambridge University Press.
- 28
- 29 50. Morris, N.S., et al., *The Single Item Literacy Screener: evaluation of a brief*
- 30 *instrument to identify limited reading ability*. BMC Fam Pract, 2006. **7**: p. 21.
- 31
- 32 51. McNaughton, C.D., et al., *Validation of a Short, 3-Item Version of the Subjective*
- 33 *Numeracy Scale*. Med Decis Making, 2015. **35**(8): p. 932-6.
- 34
- 35 52. Broadbent, E., et al., *The Brief Illness Perception Questionnaire*. Journal of
- 36 *Psychosomatic Research*, 2006. **60**(6): p. 631-637.
- 37
- 38 53. Broadbent, E., et al., *A systematic review and meta-analysis of the Brief Illness*
- 39 *Perception Questionnaire*. Psychol Health, 2015. **30**(11): p. 1361-85.
- 40
- 41 54. Horne, R., J. Weinman, and M. Hankins, *The beliefs about medicines questionnaire:*
- 42 *The development and evaluation of a new method for assessing the cognitive*
- 43 *representation of medication*. Psychology & Health, 1999. **14**(1): p. 1-24.
- 44
- 45 55. Marshall, D., et al., *Conjoint Analysis Applications in Health - How are Studies being*
- 46 *Designed and Reported?: An Update on Current Practice in the Published Literature*
- 47 *between 2005 and 2008*. Patient, 2010. **3**(4): p. 249-56.
- 48
- 49 56. Louviere, J., D. Hensher, and J. Swait, *Stated Choice Methods; analysis and*
- 50 *application..* 2000, Cambridge: Cambridge University Press.
- 51
- 52 57. de Bekker-Grob, E.W., et al., *Sample Size Requirements for Discrete-Choice*
- 53 *Experiments in Healthcare: a Practical Guide*. Patient, 2015. **8**(5): p. 373-84.
- 54
- 55 58. Steures, P., et al., *Patients' preferences in deciding between intrauterine insemination*
- 56 *and expectant management*. Hum Reprod, 2005. **20**(3): p. 752-5.
- 57
- 58 59. Sung, L., et al., *Inpatient versus outpatient management of low-risk pediatric febrile*
- 59 *neutropenia: measuring parents' and healthcare professionals' preferences*. J Clin
- 60 *Oncol*, 2004. **22**(19): p. 3922-9.
- 61
- 62 60. Dales, R.E., et al., *Intubation and mechanical ventilation for COPD: development of*
- 63 *an instrument to elicit patient preferences*. Chest, 1999. **116**(3): p. 792-800.
- 64
- 65 61. Marshall, A.A., et al., *Effect of communicating personalized rheumatoid arthritis risk*
- 66 *on concern for developing RA: A randomized controlled trial*. Patient Education and
- 67 *Counseling*, 2018.
- 68
- 69 62. *Towards Early diagnosis and biomarker validation in Arthritis Management*. Final
- 70 *report*. FP7-HEALTH project ID 305549.
- 71 <https://cordis.europa.eu/project/id/305549/reporting>.

- 1  
2  
3 63. International Committee of Medical Journal Editors (ICMJE) (2019).  
4 *Recommendations for the Conduct, Reporting, Editing, and Publication of Scholarly*  
5 *Work in Medical Journals*. <http://www.icmje.org/icmje-recommendations.pdf>  
6  
7  
8

9  
10 **Figure legend:**

11 **Figure 1.** Study Flow Chart.  
12  
13  
14  
15  
16  
17  
18

19 **Authors' contributions**

20  
21 All authors (MF, GS, RLD, LVM, CR, ME, KSB, STL, UK, BH, JV, KR) made substantial  
22 contributions to the conception, planning and writing of this study protocol. The initial draft  
23 was prepared by GS, MF, RD JV, and CR. All authors (MF, GS, RLD, LVM, CR, ME, KSB,  
24 STL, UK, BH, JV, KR) revised the protocol critically and approved the final version. All  
25 authors (MF, GS, RLD, LVM, CR, ME, KSB, STL, UK, BH, JV, KR) accept responsibility  
26 for the accuracy and integrity of this protocol.  
27  
28  
29  
30  
31

32 **Acknowledgements**

33  
34 The authors gratefully acknowledge the patient research partners who have contributed to the  
35 design of this study and the support of the Birmingham Rheumatology Research Patient  
36 Partnership. We also acknowledge input from the extended team supporting the PREFER RA  
37 case study, particularly Ardine de Wit and Meredith Smith.  
38  
39  
40  
41  
42

43 **Funding statement**

44  
45 This study is part of the PREFER project. The Patient Preferences in Benefit-Risk Assessments  
46 during the Medical Product Lifecycle (PREFER) project has received funding from the  
47 Innovative Medicines Initiative 2 Joint Undertaking under grant agreement No 115966. This  
48 Joint Undertaking receives support from the European Union's Horizon 2020 research and  
49 innovation programme and EFPIA.  
50

51 K. Raza is supported by the National Institute of Health Research Birmingham Biomedical  
52 Research Centre.  
53  
54  
55

56  
57 **Competing interests statement**

58  
59 MF, GS, LVM, ME, KSB, UK, BH, and JV have no competing interests to declare.  
60

1  
2  
3 RLD is employed by Janssen Pharmaceuticals and is a shareholder of Johnson & Johnson, Inc.  
4

5 CR is an employee and shareholder of Eli Lilly and Company.  
6

7  
8 STL is employed by Sanofi R&D and is a shareholder of Sanofi.  
9

10 KR reports grants and personal fees from Abbvie, grants and personal fees from Pfizer,  
11 personal fees from Sanofi, personal fees from Lilly, personal fees from Bristol-Myers Squibb,  
12 personal fees from UCB, personal fees from Janssen, and personal fees from Roche Chugai  
13 outside the submitted work  
14  
15  
16  
17  
18  
19  
20  
21  
22  
23  
24  
25  
26  
27  
28  
29  
30  
31  
32  
33  
34  
35  
36  
37  
38  
39  
40  
41  
42  
43  
44  
45  
46  
47  
48  
49  
50  
51  
52  
53  
54  
55  
56  
57  
58  
59  
60

For peer review only

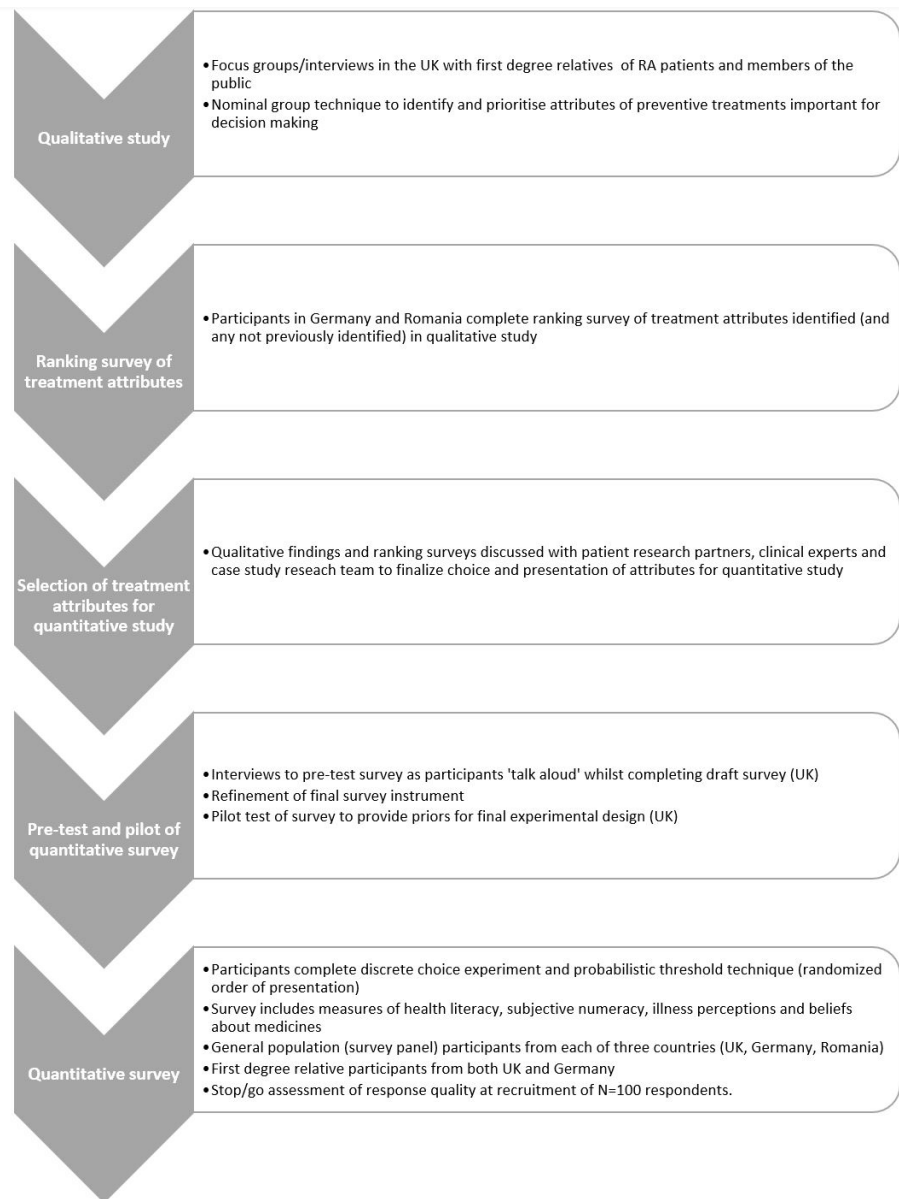

Figure 1. Study Flow Chart.

95x123mm (288 x 288 DPI)
